1 **Paternal body mass index before conception associated with offspring's birth weight**  
2 **in Chinese population: a prospective study**

3 Renying Xu, M.D., Ph.D. <sup>1,2</sup>, Weixiu Zhao, M.D. <sup>3</sup>, Tao Tan, R.D. <sup>1</sup>, Haojie Li, R.D. <sup>1</sup>,  
4 Yanping Wan, M.D. <sup>1,2</sup>

5 *1. Department of Clinical Nutrition, Ren Ji Hospital, School of Medicine, Shanghai Jiao*  
6 *Tong University, Shanghai, China;*

7 *2. Shanghai Key Laboratory of Pediatric Gastroenterology and Nutrition, China;*

8 *3. Department of Obstetrics, Ren Ji Hospital, School of Medicine, Shanghai Jiao Tong*  
9 *University, Shanghai, China;*

10 **Address correspondence to:**

11 *Renying Xu, M.D., Ph.D., Department of Clinical Nutrition, Ren Ji Hospital, School of*  
12 *Medicine, Shanghai Jiao Tong University, Shanghai 200127, China.*

13 Phone: +86-021-68383315; Fax: +86-021-68383315; Email: [xurenying7465@126.com](mailto:xurenying7465@126.com)

14 **Running title:** parental BMI and birthweight

15 **Word counts:** 2,505

16 **Reference number:** 36

17

18

19

20 **Abstract**

21 Whether paternal epigenetic information of nutrition might be inherited by their offspring  
22 remained unknown. evaluate the relationship between preconception paternal body  
23 weight and their offspring's birth weight in 1,810 Chinese mother-father-baby trios.  
24 Information on paternal and maternal preconception body weight and height was  
25 collected via a self-reported questionnaire. Birth weight was collected from medical  
26 records. Paternal preconception body weight was associated with offspring's birth weight  
27 (*p trend*=0.02) after multivariable adjustment. Each standard deviation increment of  
28 paternal body mass index was associated with an additional 29.6 g increase of birth  
29 weight (95% confident interval: 5.7g, 53.5g). The association was more pronounced in  
30 male neonates, and neonates with overweight mothers, and with mothers who gained  
31 excessive gestational weight, compared to their counterparts (all *p interaction*<0.05).  
32 Sensitivity analyses showed similar pattern to that of the main analysis. Paternal  
33 preconception body weight was associated with birth weight of their offspring.

34 **Key words:** Birth weight; Offspring; Paternal body weight; Preconception.

35

36

37

38

39

40

41 **Impact statement**

42 **What is already known on this subject?**

43 More efforts have previously been put on the maternal contribution to birth weight,  
44 however, it is uncertain whether paternal pre-conceptual body weight, an indicator for  
45 epigenetic information, might be inherited by their offspring.

46 **What do the results of this study add?**

47 In the current study that included 1,810 Chinese mother-father-baby trios, a small but  
48 significant association was observed between paternal preconception body weight and  
49 offspring's birth weight ( $p_{\text{trend}}=0.02$ ).

50 **What are the implications of these findings for clinical practice and/or further**  
51 **research?**

52 Paternal epigenetic information of nutrition could be inherited by their offspring.

53

54

55

56

57

58

59

## 60 **Introduction**

61 Most of the previous studies have been focused on birth weight dependent on maternal  
62 body weight. They found that both under- and overnutrition before conception was  
63 associated with unfavorable birth outcomes (Sebire *et al.*, 2001, Black *et al.*, 2013).  
64 These include the development of chronic diseases later in life - in particular obesity,  
65 diabetes, and cardiovascular diseases (Wahlqvist *et al.*, 2015, Haire-Joshu and Tabak,  
66 2016, Lowensohn *et al.*, 2016). However, less is known about paternal contribution to  
67 weight status in the offspring. An animal study proved that male rats fed by a high-fat  
68 diet exhibited glucose intolerance. This nutritional influence on epigenetics could result  
69 in  $\beta$ -cell dysfunction of their female offspring, leading to similar phenomenon of glucose  
70 intolerance in their adulthood (Ng *et al.*, 2010). Till now, there is a lack of human  
71 evidence to support this hypothesis (Abbasi, 2017). One cohort study reported that  
72 paternal body mass index (BMI) were associated with offspring BMI in both childhood  
73 and mid-adulthood, and the strength of the association did not reduce when offspring  
74 grew older (Cooper *et al.*, 2010). However, potential environmental confounders were  
75 not controlled in these studies. In a small prospective study on this topic (n=372),  
76 paternal preconception BMI was associated with a non-significant increasing trend of  
77 birth weight (Moss and Harris, 2015). On the contrary, a cohort study including 2,947  
78 singleton children in Netherland found that paternal BMI was associated with birthweight  
79 by univariate analysis, though no significant difference was evident following the  
80 adjustment of maternal factors (L'Abée *et al.*, 2011). Another study performed in 889  
81 Chinese mother-father-child triplet confirmed the association of paternal BMI with  
82 birthweight in sons, but not in daughters (Chen *et al.*, 2012). Of note, many of these

83 studies were limited by the absence of information on relevant factors during pregnancy  
84 (Kominiarek and Peaceman, 2017) and failure to exclude non-biological fathers in the  
85 analyses (Moss and Harris, 2015). A newly published review suggested that increased  
86 paternal BMI could negatively affect pregnancy and child health outcomes, while the  
87 association between parental BMI and birthweight cannot be established (Campbell and  
88 McPherson, 2019).

89 Therefore, we conducted the current study to examine the relationship between paternal  
90 preconception body weight (assessed by BMI) and their children's birth weight in a large  
91 Chinese population. We hypothesized that paternal preconception body weight, which  
92 was considered as the epigenetic information, was associated with his children's birth  
93 weight, independent of major maternal factors.

94

95

96

97

98

99

100

101

102

103 **Materials and Methods**

104 **Study population**

105 All the participants were recruited from the Department of Obstetrics, Ren Ji Hospital,  
106 School of Medicine, Shanghai Jiao Tong University, from 1<sup>st</sup> January to 31<sup>st</sup> December in  
107 2015. The parent's self-reported body weight and height before conception were obtained,  
108 as well as the newborns' birth weight. The details of participant recruitment/exclusion  
109 were shown in **Supplemental Figure 1**. Finally, we included 1,810 trios of father,  
110 mother and their newborns in the current analysis. The study was approved by the Ethics  
111 Committee of Ren Ji Hospital, School of Medicine, Shanghai Jiao Tong University. This  
112 was a re-identified study based on a cohort study to evaluate maternal lipid profile and  
113 birth weight (Ref No. 2014QDQ10) and informed consent was given by both parent  
114 during their induction visit.

115 **Assessment of exposure (paternal/maternal body weight and height) and outcome**  
116 **(birth weight)**

117 At the first prenatal checkup (~15<sup>th</sup> -16<sup>th</sup> gestational weeks), we asked paternal and  
118 maternal preconception body weight and height in the past 6 months. Body mass index  
119 (BMI) was calculated as the body weight (in kilogram) divided by the height squared (in  
120 meters). Body weight status was used as both continuous and categorical variable.

121 According to the Working Group of Obesity in China (WGOC) criteria for adults,  
122 participants' weight status was classified as: 'normal' (BMI < 24.0 kg/m<sup>2</sup>), 'overweight'  
123 (24 kg/m<sup>2</sup> ≤ BMI < 28.0 kg/m<sup>2</sup>), and 'obese' (BMI ≥ 28.0 kg/m<sup>2</sup>) (Zhou and Cooperative  
124 Meta-Analysis Group Of Working Group On Obesity In, 2002). As only 57 fathers (3.5%)

125 had BMI categories as ‘underweight’, they were hence merged into ‘normal’ group for  
126 analysis. After birth delivery, we collected information on offspring’s birth weight from  
127 their medical records. Briefly, measurement of birth weight was completed within 1 hour  
128 of birth. This parameter was measured using a digital scale (Seca 757, Seca China, China)  
129 by a trained nurse in delivery room. Macrosomia is defined as birth weight is equal or  
130 more than 4000 g (Rossi *et al.*, 2013).

### 131 **Assessment of covariates**

132 Information on maternal age, education level, history of major chronic diseases (e.g.,  
133 thyroid diseases, immune diseases, heart diseases, and psychiatric disorders), and family  
134 history of metabolic diseases (obese, pre-diabetes/diabetes, hypertension, dyslipidemia,  
135 nonalcoholic fatty liver diseases, and hyperuricemia/gout) were collected via a self-  
136 reported questionnaire by trained medical staffs. Data on parity, conception mode, and  
137 gestational weight gain (GWG) were obtained from medical records. All the mothers  
138 were categorized into three groups based on preconception BMI and GWG: inadequate  
139 GWC (below the lower cutoff point of IOM recommendation (Anon, 2009), optimal  
140 GWG (within the recommendation), and excessive GWG (above the upper cutoff point).  
141 The optimal GWG is 12.5-18.0 kg for underweight mother, 11.5-16.0 kg for normal  
142 weight mother, 7.0-11.5 kg for overweight mother, and 5.0-9.0 kg for obese mother.  
143 Data on hemoglobin, fasting plasma glucose, systolic blood pressure, diastolic blood  
144 pressure, plasma level of triglyceride, total cholesterol, low density lipoprotein  
145 cholesterol and high-density lipoprotein cholesterol at the first prenatal check-up were  
146 also obtained from medical record. Dyslipidemia was diagnosed if any of the following  
147 criterion was addressed: triglyceride $\geq$ 1.7 mmol/L, total cholesterol $\geq$ 5.72mmol/L, low

148 density lipoprotein cholesterol $\geq$ 3.4mmol/L, and high-density lipoprotein cholesterol $<$ 1.0  
149 mmol/L)(Srikanth and Deedwania, 2016).

## 150 **Statistical analyses**

151 All statistical analyses were conducted by SAS version 9.4 (SAS Institute, Inc, Cary, NC).

152 Formal hypothesis testing was 2-sided with a significant level of 0.05.

153 We used PROC CORR to test parental BMI and offspring's birthweight separately in  
154 boys and girls, adjusting for delivery gestational week (week), maternal age, GWG (kg),  
155 education (less than or equal to high school *or* college or above), parity (primipara *or*  
156 non-primipara), family history of diseases ('yes' *or* 'no'), hemoglobin (g/L), systolic  
157 blood pressure (mmHg), diastolic blood pressure (mmHg), dyslipidemia ('yes' *or* 'no'),  
158 and fasting plasma glucose (mmol/L) at the first prenatal check-up.

159 We used the **PROC GLM** to evaluate the relationship between parental body weight and  
160 offspring's birthweight. Further, we used **PROC LOGISTIC** to evaluate the relationship  
161 between parental body weight and the risk of developing macrosomia. We considered  
162 many potential confounders for inclusion in each model. **Model 1** was adjusted for  
163 offspring's sex and delivery gestational week. **Model 2** was adjusted for variables in  
164 *model 1* and further adjusted for maternal age, GWG (kg), preconception BMI (kg/m<sup>2</sup>),  
165 education (less than or equal to high school *or* college or above), family history of  
166 disease ('yes' *or* 'no') and parity (primipara *or* non-primipara). **Model 3** was adjusted for  
167 variables in *model 2* and further adjusted for hemoglobin (g/L), systolic blood pressure  
168 (mmHg), diastolic blood pressure (mmHg), dyslipidemia ('yes' *or* 'no'), and fasting  
169 plasma glucose (mmol/L) at the first prenatal check-up.



170 Because offspring's sex, maternal preconception BMI, and GWG might modify the  
171 association between paternal body weight and offspring's birth weight, we tested relevant  
172 interaction and subgroup analyses based on these three variables, adjusting for  
173 aforementioned covariates.

174 To test the robustness of the results obtained from the main analysis, we conducted four  
175 sensitivity analyses: 1) we adjusted birth weight by delivery gestational week; 2) we  
176 adjusted birth weight by birth length as outcome; 3) we excluded mother aged 35 years  
177 old or more during pregnancy; and 4) excluding father whose BMI was less than 18.5  
178 kg/m<sup>2</sup>.

179

180

181

182

183

184

185

186

187

188

189

190

## 191 **Results**

192 There were 1,810 full-term healthy newborns (946 boys and 864 girls). The average birth  
193 weight was  $3,415 \pm 395$  g in boys and  $3,314 \pm 376$  g in girls. The average birth length was  
194  $50.1 \pm 1.4$  cm and  $49.9 \pm 1.0$  cm for boys and girls respectively. The average gestational age  
195 at delivery was  $39.0 \pm 1.1$  weeks. Paternal body weight was associated with advanced  
196 maternal age, higher maternal preconception BMI and education level, higher prevalence  
197 of family history of metabolic diseases, and greater offspring's birth weight (**Table 1**).

198 Paternal preconception body weight was associated with offspring's birth weight, after  
199 adjustment for potential confounders (**Table 2, model 2**). Further adjustment for  
200 hemoglobin, blood pressure, plasma lipids profiles, and fasting plasma glucose (mmol/L)  
201 at the first prenatal check-up attenuated the association; however, the difference between  
202 the two extreme groups remained significant. Each standard deviation (SD) increment of  
203 paternal BMI ( $\approx 3.27$  kg/m<sup>2</sup>) was associated with an additional 29.6 g increase of birth  
204 weight [95% confident interval (CI): 5.7, 53.5 g, p trend=0.02] (**Table 2, model 3**). When  
205 considering paternal preconception BMI as a continuous variable, one-unit increase in  
206 BMI (1.0 kg/m<sup>2</sup>) was associated with a 9.6 g increase of offspring birth weight (95% CI:  
207 2.3g, 17.0g, p=0.01). Paternal body weight was not associated with the risk of  
208 macrosomia (**Table 3, model 3**).

209 The association between paternal preconception body weight and offspring's birth weight  
210 appeared to be only present in male neonates, neonates with overweight mothers and  
211 mothers with excessive GWG, compared to their counterparts (p interaction <0.05 for all,

212 **Figure 1).** Paternal preconception BMI was significantly associated with their sons' birth  
213 weight while maternal preconception BMI was significantly associated with both sons  
214 and daughters' birth weight (all  $p < 0.01$ , **Table S 1**).

215 We found similar results in the sensitive analysis with gestational week adjusted weight,  
216 or birth length adjusted weight, as well as those excluding mothers aged 35 years or more,  
217 or fathers with underweight ( $BMI < 18.5 \text{ kg/m}^2$ ) during pregnancy (**Table S 2-5**).

218

219

220

221

222

223

224

225

226

227

228

229

230

231

232 **Discussion**

233 In this prospective study including 1,810 Chinese mother-father-baby trios, we found that  
234 paternal preconception body weight was associated with offspring's birth weight, after  
235 adjustment for several potential confounders such as maternal preconception body weight.  
236 Our findings confirmed the theory that paternal BMI before pregnancy was possibly a  
237 risk factor for the gain of birth weight and thus might increase the future risk of  
238 developing obesity and related metabolic diseases. Hence, it is equally important to target  
239 paternal pre-pregnancy body weight as maternal body weight during preconception health  
240 advice.

241 Mothers have long been the focus of preconception care. Women of reproductive age are  
242 recommended to take folic acid, calcium, vitamin supplements, to taper off alcohol and  
243 smoking, reduce coffee consumption, and maintain healthy body weight (Abbasi, 2017).  
244 Although mothers take more responsibilities than fathers in conceiving a healthy baby,  
245 the influence of paternal pre-conception BMI on birth weight cannot be neglected  
246 (Campbell and McPherson, 2019). Paternal preconception environmental exposures also  
247 closely related to offspring's birth weight (Shea and Little, 1997, Moss and Harris, 2015),  
248 and future health (Kaati *et al.*, 2002, Yen *et al.*, 2016) of their offspring. Detailed  
249 mechanism of transgenerational effects has not been elucidated yet, but was thought to be  
250 associated with spermatozoan coding RNAs (Krawetz, 2005), DNA methylation  
251 imprinted in sperm (Soubry *et al.*, 2016), and identified features specific to sex  
252 chromosomes that related to epigenetic information (Pembrey *et al.*, 2006, Navratilova *et*  
253 *al.*, 2017). Consistently, we observed that preconception paternal body weight was

254 associated with offspring's birth weight. The potential role of paternal exposure on  
255 offspring health status was supported by Shea and Little's finding which had a group of  
256 fathers exposed to x-ray examinations within one year prior to conception. They found  
257 that the x-ray exposure had a marginally significant influence on birth weight, compared  
258 with those without it (3,358 g vs. 3,437 g;  $p = 0.055$ ). (Shea and Little, 1997). Likewise,  
259 in a longitudinal study ( $n=372$ ) based on the National Longitudinal Study of Adolescent  
260 Health, preconception paternal BMI was associated with offspring's birth weight (relative  
261 to father with normal weight, mean difference in birth weight was 35.6 g for overweight  
262 father, and 76.8 g for obese father) (Moss and Harris, 2015). The non-significant results  
263 of this study could be explained, at least in part, by its modest sample size (372 father-  
264 mother-infant trios) and crude estimation of biological relationship between father and  
265 children. Two previous cohort studies have been performed in 2,947 Netherland and  
266 1,041 Australian children, respectively (L'Abée *et al.*, 2011, Pomeroy *et al.*, 2015). In  
267 accordance with the present study, no significant difference between paternal BMI and  
268 birthweight was evident. However, pre-term babies (<37 gestational weeks) were  
269 included in the analysis (L'Abée *et al.*, 2011). Another possible explanation for the  
270 discrepancy between our results and previous studies might be due to the inclusion of  
271 multipara mothers in the analysis (L'Abée *et al.*, 2011, Moss and Harris, 2015, Pomeroy  
272 *et al.*, 2015).

273 In subgroup analysis, male neonates, neonates with overweight mothers, or with  
274 mothers who experienced excessive GWG were more likely to get greater birth weight,  
275 compared to their counterparts. Paternal epigenetic information seems to transfer to male  
276 offspring in sex-specific rule. In the current study, paternal BMI only correlated with

277 their son's, but not with their daughter's birth weight. Our results were consistent with  
278 Chen's study (Chen *et al.*, 2012). In addition, Similar sex-specific transgenerational  
279 responses were also observed in Swedish population(Pembrey *et al.*, 2006). Paternal  
280 smoking was associated with greater BMI at year 9 in sons, but not in daughters. Further,  
281 paternal grandfather's food supply was only linked to the mortality of grandsons  
282 (Pembrey *et al.*, 2006). A possible explanation for this is that paternal epigenetic  
283 information might leave marks on Y chromosome, hence is transferred only to male  
284 offspring (Pembrey *et al.*, 2006, Navratilova *et al.*, 2017). It is well recognized that  
285 maternal preconception obesity and higher gestational weight gain were associated with  
286 larger birth size (Strutz *et al.*, 2012, Secher *et al.*, 2014, Catalano and Shankar, 2017).  
287 Paternal effects on birth weight of their offspring were more pronounced only in neonates  
288 with overweight mother, or with mother who gained excessive weight in pregnancy.  
289 These results suggest that paternal effects could be modified by maternal factors during  
290 pregnancy.

291 Strengths of the current study included its longitudinal design, a large sample size, and  
292 precise assessment of the biological relationship between father and their children. Our  
293 study had several limitations. Firstly, both paternal and maternal body weight before  
294 pregnancy was self-reported, which might result in misclassification. However, self-  
295 reported weight is generally accurate and had high correlation with measured weight  
296 (Stunkard and Albaum, 1981, Leary *et al.*, 2010). Secondly, residual confounding is of  
297 concern because paternal demographic information, such as age (Sharma *et al.*, 2015),  
298 smoking (Han *et al.*, 2015, Yen *et al.*, 2016), and occupation (Friberg *et al.*, 2015) were  
299 not collected and these missing data could be associated with offspring's future health

300 (Cheng *et al.*, 2016). Finally, the macrosomia is considered as a more reliable parameter  
301 to predict the risk of future obesity and cardiovascular diseases compared to birth weight  
302 (Szostak-Wegierek, 2014, Woo Baidal *et al.*, 2016). However, being limited to a lack of  
303 macrosomia cases (114/1810), the statistical power of the current study was low to  
304 explore the relationship between paternal body weight and risk of macrosomia, though  
305 positive association between the preconception paternal body weight and birth weight  
306 was confirmed.

307 In conclusion, paternal preconception body weight was associated with birth weight of  
308 their offspring. Future studies with detailed information on preconception paternal  
309 demographics are warranted to confirm our findings.

310

311

312

313 **Funding details:** The study was supported by Scientific Research Starting Foundation of  
314 South Campus Ren Ji Hospital (2014QDQ10), and by the grant from Shanghai Key  
315 Laboratory of Pediatric Gastroenterology and Nutrition (No.17DZ2272000).

316 **Disclosure statement:** all the authors declared no conflict interest.

317 **Data Sharing statement:** The SAS code and data that support the findings of this study  
318 are available from the first author upon reasonable request (*Renying Xu*, email address:

319 [xurenying7465@126.com](mailto:xurenying7465@126.com)).

320

321

322 **References**

- 323 Abbasi, J., 2017. The Paternal Epigenome Makes Its Mark. *JAMA*.
- 324 Anon, 2009. In K.M. Rasmussen & A.L. Yaktine (eds.) *Weight Gain During Pregnancy: Reexamining the Guidelines*. Washington (DC).
- 325
- 326 Black, R.E., Victora, C.G., Walker, S.P., Bhutta, Z.A., Christian, P., De Onis, M., Ezzati, M.,
- 327 Grantham-Mcgregor, S., Katz, J., Martorell, R., Uauy, R., Maternal & Child Nutrition
- 328 Study, G., 2013. Maternal and child undernutrition and overweight in low-income and
- 329 middle-income countries. *Lancet*, 382, 427-451.
- 330 Campbell, J.M. & Mcpherson, N.O., 2019. Influence of increased paternal BMI on pregnancy and
- 331 child health outcomes independent of maternal effects: A systematic review and meta-
- 332 analysis. *Obes Res Clin Pract*, 13, 511-521.
- 333 Catalano, P.M. & Shankar, K., 2017. Obesity and pregnancy: mechanisms of short term and long
- 334 term adverse consequences for mother and child. *BMJ*, 356, j1.
- 335 Chen, Y.P., Xiao, X.M., Li, J., Reichetzeder, C., Wang, Z.N. & Hocher, B., 2012. Paternal body mass
- 336 index (BMI) is associated with offspring intrauterine growth in a gender dependent
- 337 manner. *PLoS One*, 7, e36329.
- 338 Cheng, E.R., Hawkins, S.S., Rifas-Shiman, S.L., Gillman, M.W. & Taveras, E.M., 2016. Association
- 339 of missing paternal demographics on infant birth certificates with perinatal risk factors
- 340 for childhood obesity. *BMC Public Health*, 16, 453.
- 341 Cooper, R., Hypponen, E., Berry, D. & Power, C., 2010. Associations between parental and
- 342 offspring adiposity up to midlife: the contribution of adult lifestyle factors in the 1958
- 343 British Birth Cohort Study. *Am J Clin Nutr*, 92, 946-53.
- 344 Friberg, D., Lundkvist, K., Li, X. & Sundquist, K., 2015. Parental poverty and occupation as risk
- 345 factors for pediatric sleep-disordered breathing. *Sleep Med*, 16, 1169-75.
- 346 Haire-Joshu, D. & Tabak, R., 2016. Preventing Obesity Across Generations: Evidence for Early Life
- 347 Intervention. *Annu Rev Public Health*, 37, 253-71.
- 348 Han, T.S., Hart, C.L., Haig, C., Logue, J., Upton, M.N., Watt, G.C. & Lean, M.E., 2015.
- 349 Contributions of maternal and paternal adiposity and smoking to adult offspring
- 350 adiposity and cardiovascular risk: the Midspan Family Study. *BMJ Open*, 5, e007682.
- 351 Kaati, G., Bygren, L.O. & Edvinsson, S., 2002. Cardiovascular and diabetes mortality determined
- 352 by nutrition during parents' and grandparents' slow growth period. *Eur J Hum Genet*, 10,
- 353 682-8.
- 354 Kominiarek, M.A. & Peaceman, A.M., 2017. Gestational weight gain. *Am J Obstet Gynecol*.
- 355 Krawetz, S.A., 2005. Paternal contribution: new insights and future challenges. *Nat Rev Genet*, 6,
- 356 633-42.
- 357 L'abee, C., Vrieze, I., Kluck, T., Erwich, J.J., Stolk, R.P. & Sauer, P.J., 2011. Parental factors
- 358 affecting the weights of the placenta and the offspring. *J Perinat Med*, 39, 27-34.
- 359 Leary, S., Davey Smith, G. & Ness, A., 2010. No evidence of large differences in mother-daughter
- 360 and father-son body mass index concordance in a large UK birth cohort. *Int J Obes*
- 361 *(Lond)*, 34, 1191-2.
- 362 Lowensohn, R.I., Stadler, D.D. & Naze, C., 2016. Current Concepts of Maternal Nutrition. *Obstet*
- 363 *Gynecol Surv*, 71, 413-26.



364 Moss, J.L. & Harris, K.M., 2015. Impact of maternal and paternal preconception health on birth  
365 outcomes using prospective couples' data in Add Health. *Arch Gynecol Obstet*, 291, 287-  
366 98.

367 Navratilova, P., Danks, G.B., Long, A., Butcher, S., Manak, J.R. & Thompson, E.M., 2017. Sex-  
368 specific chromatin landscapes in an ultra-compact chordate genome. *Epigenetics*  
369 *Chromatin*, 10, 3.

370 Ng, S.F., Lin, R.C., Laybutt, D.R., Barres, R., Owens, J.A. & Morris, M.J., 2010. Chronic high-fat diet  
371 in fathers programs beta-cell dysfunction in female rat offspring. *Nature*, 467, 963-6.

372 Pembrey, M.E., Bygren, L.O., Kaati, G., Edvinsson, S., Northstone, K., Sjöström, M., Golding, J. &  
373 Team, A.S., 2006. Sex-specific, male-line transgenerational responses in humans. *Eur J*  
374 *Hum Genet*, 14, 159-66.

375 Pomeroy, E., Wells, J.C., Cole, T.J., O'callaghan, M. & Stock, J.T., 2015. Relationships of maternal  
376 and paternal anthropometry with neonatal body size, proportions and adiposity in an  
377 Australian cohort. *Am J Phys Anthropol*, 156, 625-36.

378 Rossi, A.C., Mullin, P. & Prefumo, F., 2013. Prevention, management, and outcomes of  
379 macrosomia: a systematic review of literature and meta-analysis. *Obstet Gynecol Surv*,  
380 68, 702-9.

381 Sebire, N.J., Jolly, M., Harris, J.P., Wadsworth, J., Joffe, M., Beard, R.W., Regan, L. & Robinson, S.,  
382 2001. Maternal obesity and pregnancy outcome: a study of 287,213 pregnancies in  
383 London. *Int J Obes Relat Metab Disord*, 25, 1175-82.

384 Secher, A.L., Parellada, C.B., Ringholm, L., Asbjørnsdottir, B., Damm, P. & Mathiesen, E.R., 2014.  
385 Higher gestational weight gain is associated with increasing offspring birth weight  
386 independent of maternal glycemic control in women with type 1 diabetes. *Diabetes Care*,  
387 37, 2677-84.

388 Sharma, R., Agarwal, A., Rohra, V.K., Assidi, M., Abu-Elmagd, M. & Turki, R.F., 2015. Effects of  
389 increased paternal age on sperm quality, reproductive outcome and associated  
390 epigenetic risks to offspring. *Reprod Biol Endocrinol*, 13, 35.

391 Shea, K.M. & Little, R.E., 1997. Is there an association between preconception paternal x-ray  
392 exposure and birth outcome? The ALSPAC Study Team. Avon Longitudinal Study of  
393 Pregnancy and Childhood. *Am J Epidemiol*, 145, 546-51.

394 Soubry, A., Guo, L., Huang, Z., Hoyo, C., Romanus, S., Price, T. & Murphy, S.K., 2016. Obesity-  
395 related DNA methylation at imprinted genes in human sperm: Results from the TIEGER  
396 study. *Clin Epigenetics*, 8, 51.

397 Srikanth, S. & Deedwania, P., 2016. Management of Dyslipidemia in Patients with Hypertension,  
398 Diabetes, and Metabolic Syndrome. *Curr Hypertens Rep*, 18, 76.

399 Strutz, K.L., Richardson, L.J. & Hussey, J.M., 2012. Preconception health trajectories and birth  
400 weight in a national prospective cohort. *J Adolesc Health*, 51, 629-36.

401 Stunkard, A.J. & Albaum, J.M., 1981. The accuracy of self-reported weights. *Am J Clin Nutr*, 34,  
402 1593-9.

403 Szostak-Wegierek, D., 2014. Intrauterine nutrition: long-term consequences for vascular health.  
404 *Int J Womens Health*, 6, 647-56.

405 Wahlqvist, M.L., Krawetz, S.A., Rizzo, N.S., Dominguez-Bello, M.G., Szymanski, L.M., Barkin, S.,  
406 Yatkine, A., Waterland, R.A., Mennella, J.A., Desai, M., Ross, M.G., Krebs, N.F., Young,  
407 B.E., Wardle, J., Wrann, C.D. & Kral, J.G., 2015. Early-life influences on obesity: from  
408 preconception to adolescence. *Ann N Y Acad Sci*, 1347, 1-28.

409 Woo Baidal, J.A., Locks, L.M., Cheng, E.R., Blake-Lamb, T.L., Perkins, M.E. & Taveras, E.M., 2016.  
410 Risk Factors for Childhood Obesity in the First 1,000 Days: A Systematic Review. *Am J*  
411 *Prev Med*, 50, 761-779.

412 Yen, A.M., Boucher, B.J., Chiu, S.Y., Fann, J.C., Chen, S.L., Huang, K.C. & Chen, H.H., 2016. Longer  
413 Duration and Earlier Age of Onset of Paternal Betel Chewing and Smoking Increase  
414 Metabolic Syndrome Risk in Human Offspring, Independently, in a Community-Based  
415 Screening Program in Taiwan. *Circulation*, 134, 392-404.  
416 Zhou, B. & Cooperative Meta-Analysis Group of Working Group on Obesity In, C., 2002.  
417 [Prospective study for cut-off points of body mass index in Chinese adults]. *Zhonghua*  
418 *Liu Xing Bing Xue Za Zhi*, 23, 431-4.

419

420

421

422

423

#### 424 **Figure Legend**

425 **Figure 1.** Mean difference and 95% confidence intervals in offspring's birth weight  
426 associated with per SD increase of paternal preconception BMI in 1,810 Chinese mother-  
427 father-baby trios.

#### 428 **Note:**

429 **1.** Interaction between paternal body weight status and offspring's sex p value=0.04;  
430 interaction between maternal and paternal body weight status p value<0.001; interaction  
431 between paternal body weight status and gestational weight gain p value<0.001.

432 **2.** Adjusted for offspring's sex, delivery gestational week (week), maternal age, GWG  
433 (kg), BMI ( $\text{kg}/\text{m}^2$ ), education (less than or equal to high school, *or* college or above),  
434 parity (primipara *or* non-primipara), family history of diseases ('yes' *or* 'no'),  
435 hemoglobin (g/L), systolic blood pressure (mmHg), diastolic blood pressure (mmHg),  
436 plasma level of triglyceride (mmol/L), total cholesterol (mmol/L), low density lipoprotein  
437 cholesterol (mmol/L), high density lipoprotein cholesterol (mmol/L), and fasting plasma  
438 glucose (mmol/L) at the first prenatal check-up (~15<sup>th</sup>-16<sup>th</sup> gestational week).

439

440

441 **Table 1.** The maternal and neonatal baseline characteristics by paternal body weight

442 status

| Subjects                  | Variables                     | Father's body weight status |                |          | P value |      |
|---------------------------|-------------------------------|-----------------------------|----------------|----------|---------|------|
|                           |                               | Normal                      | overweigh<br>t | obese    |         |      |
|                           | Number                        | 958                         | 651            | 201      | --      |      |
| Maternal                  | Age, y                        | 28.6±4.0                    | 29.3±4.0       | 28.8±3.8 | <0.01   |      |
|                           | BMI, kg/m <sup>2</sup>        | 20.9±3.1                    | 21.2±3.0       | 21.6±3.0 | <0.01   |      |
|                           | Family history of diseases, % |                             |                |          |         |      |
|                           |                               | Yes                         | 22.7           | 26.2     | 33.3    | 0.01 |
|                           |                               | No                          | 77.3           | 73.9     | 66.7    |      |
|                           | Hemoglobin, g/L <sup>+</sup>  | 118±10.5                    | 121±43.1       | 119±9.7  | 0.27    |      |
|                           | SBP, mmHg <sup>+</sup>        | 111±12.6                    | 111±13.6       | 112±14.0 | 0.55    |      |
|                           | DBP, mmHg <sup>+</sup>        | 66.4±9.6                    | 66.5±9.7       | 67.3±9.3 | 0.44    |      |
|                           | TG, mmol/L <sup>+</sup>       | 1.8±0.8                     | 1.9±0.9        | 1.8±0.8  | 0.24    |      |
|                           | TC, mmol/L <sup>+</sup>       | 5.6±1.0                     | 5.6±1.1        | 5.5±1.1  | 0.69    |      |
|                           | HDL-C, mmol/L <sup>+</sup>    | 2.1±0.4                     | 2.1±0.4        | 2.1±0.4  | 0.28    |      |
|                           | LDL-C, mmol/L <sup>+</sup>    | 2.9±0.8                     | 2.9±0.8        | 2.9±0.8  | 0.95    |      |
|                           | FPG, mmol/L <sup>+</sup>      | 4.5±0.5                     | 4.6±0.4        | 4.6±0.3  | 0.43    |      |
|                           | GWG, %                        |                             |                |          |         |      |
|                           |                               | Inadequate                  | 20.7           | 19.4     | 23.9    | 0.18 |
|                           | Optimal                       | 38.6                        | 37.9           | 28.9     |         |      |
|                           | Excessive                     | 40.7                        | 42.7           | 47.3     |         |      |
| Delivery gestational week |                               | 39.0±1.1                    | 39.0±1.0       | 39.0±1.1 | 0.70    |      |
| Parity, %                 |                               |                             |                |          |         |      |
|                           | Primipara                     | 79.3                        | 77.4           | 82.1     | 0.47    |      |
|                           | Non-primipara                 | 20.7                        | 22.6           | 17.9     |         |      |
| Highest education, %      |                               |                             |                |          |         |      |

|          |                  |               |           |           |           |       |
|----------|------------------|---------------|-----------|-----------|-----------|-------|
|          |                  | ≤ high school | 50        | 44.1      | 59.7      | <0.01 |
|          |                  | ≥ college     | 50        | 55.9      | 40.3      |       |
| Neonatal | Sex, girls, %    |               | 49.5      | 45.8      | 45.8      | 0.36  |
|          | Birth weight, g  |               | 3,338±384 | 3,388±384 | 3,437±416 | <0.01 |
|          | Birth length, cm |               | 50.1±1.0  | 50.1±1.4  | 50.2±1.1  | 0.13  |

443

444 **Note:**

445 **1.** BMI, body mass index; SBP, systolic blood pressure; DBP, diastolic blood pressure;  
 446 TG, triglyceride; TC, total cholesterol, FPG, fasting plasma glucose; GWG, gestational  
 447 weight gain.

448 **2.** \*, abnormal distribution; +, obtained at the first prenatal check-up (gestational age  
 449 ~15<sup>th</sup> -16<sup>th</sup> week); '--' mean not applicable.

450 **3.** Paternal body weight status was defined as follows: 'normal' (BMI < 24.0 kg/m<sup>2</sup>),  
 451 'overweight' (24.0 kg/m<sup>2</sup> ≤ BMI < 28.0 kg/m<sup>2</sup>), and 'obese' (BMI ≥ 28.0 kg/m<sup>2</sup>)  
 452 according to the Working Group of Obesity in China (WGOC) criteria for adults.

453

454

455

456

457

458

459

460

461

462

463

464 **Table 2.** Mean difference and 95% confidence intervals in offspring's birth weight across  
465 three paternal groups in 1, 810 Chinese father-mother-baby trios

| Model   | Father's body weight status |                    |                   | Per SD            | P trend |
|---------|-----------------------------|--------------------|-------------------|-------------------|---------|
|         | Normal                      | Overweight         | Obese             |                   |         |
| Number  | 958                         | 651                | 201               | /                 | /       |
| Model 1 | <b>0 (Ref)</b>              | 52.5 (16.5, 88.4)  | 97.0 (42.1, 152)  | 38.2 (21.6, 54.9) | <0.001  |
| Model 2 | <b>0 (Ref)</b>              | 48.9 (13.8, 84.0)  | 94.4 (40.7, 148)  | 36.0 (19.6, 52.4) | <0.001  |
| Model 3 | <b>0 (Ref)</b>              | 49.6 (-3.3, 102.5) | 87.3 (8.9, 165.6) | 35.5 (11.5, 59.4) | 0.004   |

466 **Note:**

467 **1.** Father's body weight status was defined as follows: 'normal' (BMI < 24.0 kg/m<sup>2</sup>),  
468 'overweight' (24.0 kg/m<sup>2</sup> ≤ BMI < 28.0 kg/m<sup>2</sup>), and 'obese' (BMI ≥ 28.0 kg/m<sup>2</sup>)  
469 according to the Working Group of Obesity in China (WGO) criteria for adults. '/'  
470 mean not applicable. Per SD for paternal BMI ≈ 3.27 kg/m<sup>2</sup>.

471 **2.** Dyslipidemia was diagnosed if any of the following was addressed: triglyceride ≥ 1.7  
472 mmol/L, total cholesterol ≥ 5.72 mmol/L, low-density lipoprotein cholesterol ≥ 3.4 mmol/L,  
473 high-density lipoprotein cholesterol < 1.0 mmol/L.

474 **3. Model 1** adjusted for offspring's sex and delivery gestational week (week).

475 **4. Model 2** adjusted for variables in **model 1** and further adjusted for maternal age,  
476 GWG (kg), BMI (kg/m<sup>2</sup>), education (less than or equal to high school *or* college or  
477 above), family history of metabolic diseases ('yes' *or* 'no') and parity (primipara *or* non-  
478 primipara).

479 **5. Model 3** adjusted for variables in **model 2** and further adjusted for hemoglobin (g/L),  
480 systolic blood pressure (mmHg), diastolic blood pressure (mmHg), dyslipidemia ('yes',  
481 *or* 'no'), and fasting plasma glucose (mmol/L) at the first prenatal check-up (~15<sup>th</sup>-16<sup>th</sup>  
482 gestational week).

483

484

485 **Table 3.** Adjusted Odd Ratios and 95% confidence intervals for risks of macrosomia  
486 across three paternal groups in 1, 810 Chinese father-mother-baby trios

| Model   | Father's body weight status |                   |                   | Per SD             | P trend |
|---------|-----------------------------|-------------------|-------------------|--------------------|---------|
|         | Normal                      | Overweight        | Obese             |                    |         |
| Number  | 958                         | 651               | 201               | /                  | /       |
| No.     | 49                          | 39                | 16                | /                  | /       |
| Model 1 | <b>0 (Ref)</b>              | 1.21 (0.78, 1.88) | 1.59 (0.88, 2.89) | 1.21 (1.001, 1.46) | 0.049   |
| Model 2 | <b>0 (Ref)</b>              | 1.18 (0.76, 1.84) | 1.47 (0.8, 2.69)  | 1.17 (0.97, 1.41)  | 0.11    |
| Model 3 | <b>0 (Ref)</b>              | 1.09 (0.57, 2.11) | 1.23 (0.5, 3.03)  | 1.11 (0.84, 1.46)  | 0.47    |

487 **Note:**

488 **1.** Paternal body weight status was defined as follows: 'normal' (BMI < 24.0 kg/m<sup>2</sup>),  
489 'overweight' (24.0 kg/m<sup>2</sup> ≤ BMI < 28.0 kg/m<sup>2</sup>), and 'obese' (BMI ≥ 28.0 kg/m<sup>2</sup>)  
490 according to the Working Group of Obesity in China (WGOC) criteria for adults.  
491 Macrosomia was defined as birth weight was equal or greater than 4000 g.

492 **2.** '/' mean not applicable. Per SD for paternal BMI ≈ 3.27 kg/m<sup>2</sup>.

493 **3.** Dyslipidemia was diagnosed if any of the following was addressed: triglyceride ≥ 1.7  
494 mmol/L, total cholesterol ≥ 5.72 mmol/L, low-density lipoprotein cholesterol ≥ 3.4 mmol/L,  
495 high-density lipoprotein cholesterol < 1.0 mmol/L.

496 **4. Model 1** adjusted for offspring's sex and delivery gestational week (week).

497 **5. Model 2** adjusted for variables in **model 1** and further adjusted for maternal age, GWG  
498 (kg), BMI (kg/m<sup>2</sup>), education (less than or equal to high school *or* college or above),  
499 family history of metabolic diseases ('yes' *or* 'no') and parity (primipara *or* non-  
500 primipara).

501 **6. Model 3** adjusted for variables in **model 2** and further adjusted for hemoglobin (g/L),  
502 systolic blood pressure (mmHg), diastolic blood pressure (mmHg), dyslipidemia ('yes',  
503 *or* 'no'), and fasting plasma glucose (mmol/L) at the first prenatal check-up (~15<sup>th</sup>-16<sup>th</sup>  
504 gestational week).

505

506

507 **Supporting Information legends**

508 **Supplemental Table 1.** The association between parental preconception BMI and their  
509 children's birth weight in 1,810 Chinese mother-father-baby trios

510 **Supplemental Table 2.** Mean difference and 95% confidence intervals in offspring's  
511 birth weight (g/week) adjusted by delivery gestational week, across three paternal groups  
512 in 1,810 Chinese mother-father-baby trios

513 **Supplemental Table 3.** Mean difference and 95% confidence intervals in offspring's  
514 birth weight adjusted by birth length (g/cm), across three paternal groups in 1,810  
515 Chinese mother-father-baby trios

516 **Supplemental Table 4.** Mean difference and 95% confidence intervals in offspring's  
517 birth weight (g), across three paternal groups in 1,648 Chinese mother-father-baby trios,  
518 excluding women aged 35 years old or more

519 **Supplemental Table 5.** Mean difference and 95% confidence intervals in offspring's  
520 birth weight (g), across three paternal groups in 1,753 Chinese mother-father-baby trios,  
521 excluding father with underweight

522

523 **Supplemental Figure 1.** Sample recruitment in the study.

524

525

526

527

528

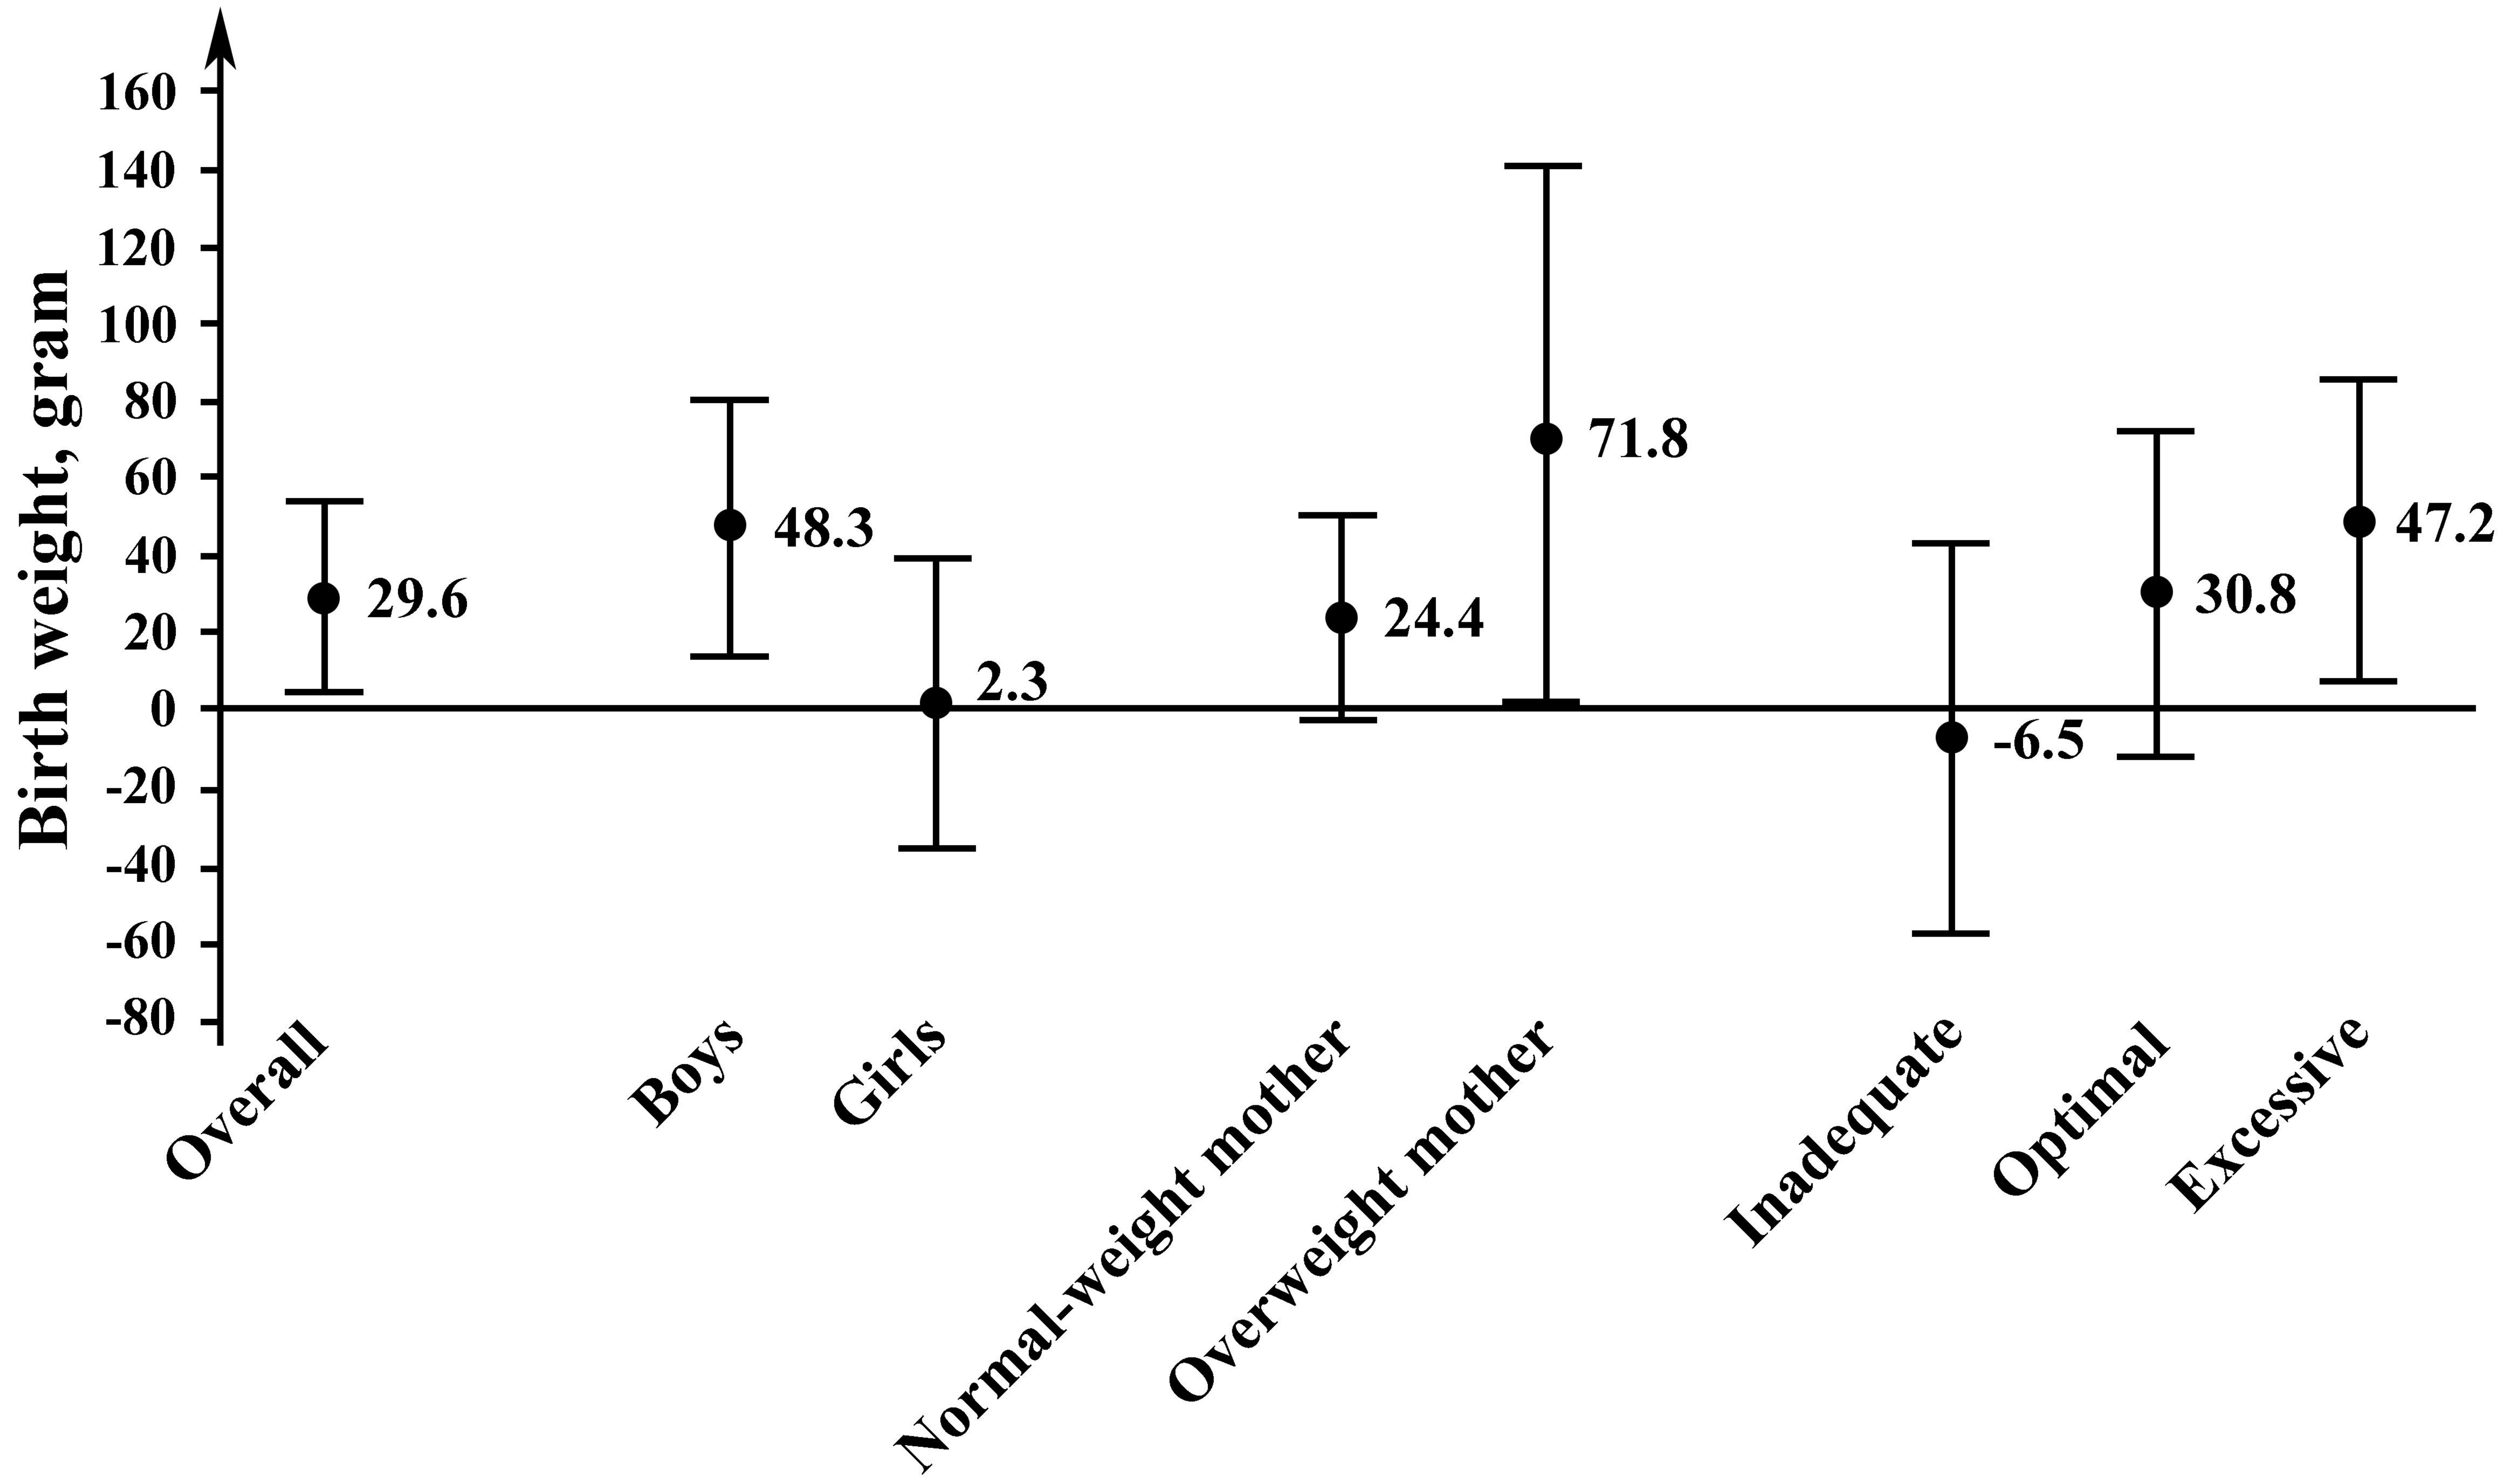

Source: https://www.medrxiv.org/content/medrxiv/early/2021/06/21/2021.06.17.21258438.full.pdf
