**1 Paternal body mass index before conception associated with offspring's birth weight**  
**2 in Chinese population: a prospective study**

3 Renying Xu, M.D., Ph.D.<sup>1,2</sup>, Weixiu Zhao, M.D.<sup>3</sup>, Tao Tan, R.D.<sup>1</sup>, Haojie Li, R.D.<sup>1</sup>,  
 4 Yanping Wan, M.D.<sup>1,2</sup>

5 *1. Department of Clinical Nutrition, Ren Ji Hospital, School of Medicine, Shanghai Jiao*  
 6 *Tong University, Shanghai, China;*

7 *2. Shanghai Key Laboratory of Pediatric Gastroenterology and Nutrition, China;*

8 *3. Department of Obstetrics, Ren Ji Hospital, School of Medicine, Shanghai Jiao Tong*  
 9 *University, Shanghai, China;*

**10 Address correspondence to:**

11 *Renying Xu, M.D., Ph.D., Department of Clinical Nutrition, Ren Ji Hospital, School of*  
 12 *Medicine, Shanghai Jiao Tong University, Shanghai 200127, China.*

13 Phone: +86-021-68383315; Fax: +86-021-68383315; Email: [xurenying7465@126.com](mailto:xurenying7465@126.com)

14 **Running title:** parental BMI and birthweight

15 **Word counts:** 2,505

16 **Reference number:** 36

17

18

19

## Abstract

Whether paternal epigenetic information of nutrition might be inherited by their offspring remained unknown. We evaluated the relationship between preconception paternal body weight and their offspring's birth weight in 1,810 Chinese mother-father-baby trios. Information on paternal and maternal preconception body weight and height was collected via a self-reported questionnaire. Birth weight was collected from medical records. Paternal preconception body weight was associated with offspring's birth weight ( $p \text{ trend}=0.02$ ) after multivariable adjustment. Each standard deviation increment of paternal body mass index was associated with an additional 29.6 g increase of birth weight (95% confidence interval: 5.7g, 53.5g). The association was more pronounced in male neonates, and neonates with overweight mothers, and with mothers who gained excessive gestational weight, compared to their counterparts (all  $p \text{ interaction}<0.05$ ). Sensitivity analyses showed similar pattern to that of the main analysis. Paternal preconception body weight was associated with birth weight of their offspring.

**Key words:** Birth weight; Offspring; Paternal body weight; Preconception.

## 41 **Impact statement**

### 42 **What is already known on this subject?**

43 More efforts have previously been put on the maternal contribution to birth weight,  
44 however, it is uncertain whether paternal pre-conceptional body weight, an indicator for  
45 epigenetic information, might be inherited by their offspring.

### 46 **What do the results of this study add?**

47 In the current study that included 1,810 Chinese mother-father-baby trios, a small but  
48 significant association was observed between paternal preconception body weight and  
49 offspring's birth weight ( $p_{\text{trend}}=0.02$ ).

### 50 **What are the implications of these findings for clinical practice and/or further** 51 **research?**

52 Paternal epigenetic information of nutrition could be inherited by their offspring.

53

54

55

56

57

58

59

## Introduction

Most of the previous studies have been focused on birth weight dependent on maternal body weight. They found that both under- and overnutrition before conception was associated with unfavorable birth outcomes (Sebire *et al.*, 2001, Black *et al.*, 2013). These include the development of chronic diseases later in life - in particular obesity, diabetes, and cardiovascular diseases (Wahlqvist *et al.*, 2015, Haire-Joshu and Tabak, 2016, Lowensohn *et al.*, 2016). However, less is known about paternal contribution to weight status in the offspring. An animal study proved that male rats fed by a high-fat diet exhibited glucose intolerance. This nutritional influence on epigenetics could result in  $\beta$ -cell dysfunction of their female offspring, leading to similar phenomenon of glucose intolerance in their adulthood (Ng *et al.*, 2010). Till now, there is a lack of human evidence to support this hypothesis (Abbasi, 2017). One cohort study reported that paternal body mass index (BMI) were associated with offspring BMI in both childhood and mid-adulthood, and the strength of the association did not reduce when offspring grew older (Cooper *et al.*, 2010). However, potential environmental confounders were not controlled in these studies. In a small prospective study on this topic (n=372), paternal preconception BMI was associated with a non-significant increasing trend of birth weight (Moss and Harris, 2015). On the contrary, a cohort study including 2,947 singleton children in Netherland found that paternal BMI was associated with birthweight by univariate analysis, though no significant difference was evident following the adjustment of maternal factors (L'Abée *et al.*, 2011). Another study performed in 889 Chinese mother-father-child triplet confirmed the association of paternal BMI with birthweight in sons, but not in daughters (Chen *et al.*, 2012). Of note, many of these

studies were limited by the absence of information on relevant factors during pregnancy (Kominiarek and Peaceman, 2017) and failure to exclude non-biological fathers in the analyses (Moss and Harris, 2015). A newly published review suggested that increased paternal BMI could negatively affect pregnancy and child health outcomes, while the association between parental BMI and birthweight cannot be established (Campbell and McPherson, 2019).

Therefore, we conducted the current study to examine the relationship between paternal preconception body weight (assessed by BMI) and their children's birth weight in a large Chinese population. We hypothesized that paternal preconception body weight, which was considered as the epigenetic information, was associated with his children's birth weight, independent of major maternal factors.

## Materials and Methods

### Study population

All the participants were recruited from the Department of Obstetrics, Ren Ji Hospital, School of Medicine, Shanghai Jiao Tong University, from 1<sup>st</sup> January to 31<sup>st</sup> December in 2015. The parent's self-reported body weight and height before conception were obtained, as well as the newborns' birth weight. The details of participant recruitment/exclusion were shown in **Supplemental Figure 1**. Finally, we included 1,810 trios of father, mother and their newborns in the current analysis. The study was approved by the Ethics Committee of Ren Ji Hospital, School of Medicine, Shanghai Jiao Tong University. This was a re-identified study based on a cohort study to evaluate maternal lipid profile and birth weight (Ref No. 2014QDQ10) and informed consent was given by both parent during their induction visit.

### Assessment of exposure (paternal/maternal body weight and height) and outcome (birth weight)

At the first prenatal checkup (~15<sup>th</sup> -16<sup>th</sup> gestational weeks), we asked paternal and maternal preconception body weight and height in the past 6 months. Body mass index (BMI) was calculated as the body weight (in kilogram) divided by the height squared (in meters). Body weight status was used as both continuous and categorical variable. According to the Working Group of Obesity in China (WGOC) criteria for adults, participants' weight status was classified as: 'normal' ( $\text{BMI} < 24.0 \text{ kg/m}^2$ ), 'overweight' ( $24 \text{ kg/m}^2 \leq \text{BMI} < 28.0 \text{ kg/m}^2$ ), and 'obese' ( $\text{BMI} \geq 28.0 \text{ kg/m}^2$ ) (Zhou and Cooperative Meta-Analysis Group Of Working Group On Obesity In, 2002). As only 57 fathers (3.5%)

had BMI categories as ‘underweight’, they were hence merged into ‘normal’ group for analysis. After birth delivery, we collected information on offspring’s birth weight from their medical records. Briefly, measurement of birth weight was completed within 1 hour of birth. This parameter was measured using a digital scale (Seca 757, Seca China, China) by a trained nurse in delivery room. Macrosomia is defined as birth weight is equal or more than 4000 g (Rossi *et al.*, 2013).

### **Assessment of covariates**

Information on maternal age, education level, history of major chronic diseases (e.g., thyroid diseases, immune diseases, heart diseases, and psychiatric disorders), and family history of metabolic diseases (obese, pre-diabetes/diabetes, hypertension, dyslipidemia, nonalcoholic fatty liver diseases, and hyperuricemia/gout) were collected via a self-reported questionnaire by trained medical staffs. Data on parity, conception mode, and gestational weight gain (GWG) were obtained from medical records. All the mothers were categorized into three groups based on preconception BMI and GWG: inadequate GWC (below the lower cutoff point of IOM recommendation (Anon, 2009), optimal GWG (within the recommendation), and excessive GWG (above the upper cutoff point). The optimal GWG is 12.5-18.0 kg for underweight mother, 11.5-16.0 kg for normal weight mother, 7.0-11.5 kg for overweight mother, and 5.0-9.0 kg for obese mother. Data on hemoglobin, fasting plasma glucose, systolic blood pressure, diastolic blood pressure, plasma level of triglyceride, total cholesterol, low density lipoprotein cholesterol and high-density lipoprotein cholesterol at the first prenatal check-up were also obtained from medical record. Dyslipidemia was diagnosed if any of the following criterion was addressed: triglyceride $\geq$ 1.7 mmol/L, total cholesterol $\geq$ 5.72mmol/L, low

density lipoprotein cholesterol  $\geq 3.4$  mmol/L, and high-density lipoprotein cholesterol  $< 1.0$  mmol/L) (Srikanth and Deedwania, 2016).

## Statistical analyses

All statistical analyses were conducted by SAS version 9.4 (SAS Institute, Inc, Cary, NC).

Formal hypothesis testing was 2-sided with a significant level of 0.05.

We used PROC CORR to test parental BMI and offspring's birthweight separately in boys and girls, adjusting for delivery gestational week (week), maternal age, GWG (kg), education (less than or equal to high school *or* college or above), parity (primipara *or* non-primipara), family history of diseases ('yes' *or* 'no'), hemoglobin (g/L), systolic blood pressure (mmHg), diastolic blood pressure (mmHg), dyslipidemia ('yes' *or* 'no'), and fasting plasma glucose (mmol/L) at the first prenatal check-up.

We used the **PROC GLM** to evaluate the relationship between parental body weight and offspring's birthweight. Further, we used **PROC LOGISTIC** to evaluate the relationship between parental body weight and the risk of developing macrosomia. We considered many potential confounders for inclusion in each model. **Model 1** was adjusted for offspring's sex and delivery gestational week. **Model 2** was adjusted for variables in **model 1** and further adjusted for maternal age, GWG (kg), preconception BMI ( $\text{kg/m}^2$ ), education (less than or equal to high school *or* college or above), family history of disease ('yes' *or* 'no') and parity (primipara *or* non-primipara). **Model 3** was adjusted for variables in **model 2** and further adjusted for hemoglobin (g/L), systolic blood pressure (mmHg), diastolic blood pressure (mmHg), dyslipidemia ('yes' *or* 'no'), and fasting plasma glucose (mmol/L) at the first prenatal check-up.



Because offspring's sex, maternal preconception BMI, and GWG might modify the association between paternal body weight and offspring's birth weight, we tested relevant interaction and subgroup analyses based on these three variables, adjusting for aforementioned covariates.

To test the robustness of the results obtained from the main analysis, we conducted four sensitivity analyses: 1) we adjusted birth weight by delivery gestational week; 2) we adjusted birth weight by birth length as outcome; 3) we excluded mother aged 35 years old or more during pregnancy; and 4) excluding father whose BMI was less than 18.5 kg/m<sup>2</sup>.

190

## 191 **Results**

192 There were 1,810 full-term healthy newborns (946 boys and 864 girls). The average birth  
193 weight was 3,415±395 g in boys and 3,314±376 g in girls. The average birth length was  
194 50.1±1.4 cm and 49.9±1.0 cm for boys and girls respectively. The average gestational age  
195 at delivery was 39.0±1.1 weeks. Paternal body weight was associated with advanced  
196 maternal age, higher maternal preconception BMI and education level, higher prevalence  
197 of family history of metabolic diseases, and greater offspring's birth weight (**Table 1**).

198 Paternal preconception body weight was associated with offspring's birth weight, after  
199 adjustment for potential confounders (**Table 2, model 2**). Further adjustment for  
200 hemoglobin, blood pressure, plasma lipids profiles, and fasting plasma glucose (mmol/L)  
201 at the first prenatal check-up attenuated the association; however, the difference between  
202 the two extreme groups remained significant. Each standard deviation (SD) increment of  
203 paternal BMI ( $\approx 3.27 \text{ kg/m}^2$ ) was associated with an additional 29.6 g increase of birth  
204 weight [95% confident interval (CI): 5.7, 53.5 g,  $p \text{ trend}=0.02$ ] (**Table 2, model 3**). When  
205 considering paternal preconception BMI as a continuous variable, one-unit increase in  
206 BMI ( $1.0 \text{ kg/m}^2$ ) was associated with a 9.6 g increase of offspring birth weight (95% CI:  
207 2.3g, 17.0g,  $p=0.01$ ). Paternal body weight was not associated with the risk of  
208 macrosomia (**Table 3, model 3**).

209 The association between paternal preconception body weight and offspring's birth weight  
210 appeared to be only present in male neonates, neonates with overweight mothers and  
211 mothers with excessive GWG, compared to their counterparts ( $p \text{ interaction} < 0.05$  for all,

**Figure 1).** Paternal preconception BMI was significantly associated with their sons' birth weight while maternal preconception BMI was significantly associated with both sons and daughters' birth weight (all  $p < 0.01$ , **Table S 1**).

We found similar results in the sensitive analysis with gestational week adjusted weight, or birth length adjusted weight, as well as those excluding mothers aged 35 years or more, or fathers with underweight ( $\text{BMI} < 18.5 \text{ kg/m}^2$ ) during pregnancy (**Table S 2-5**).

231

## 232 **Discussion**

233 In this prospective study including 1,810 Chinese mother-father-baby trios, we found that  
 234 paternal preconception body weight was associated with offspring's birth weight, after  
 235 adjustment for several potential confounders such as maternal preconception body weight.  
 236 Our findings confirmed the theory that paternal BMI before pregnancy was possibly a  
 237 risk factor for the gain of birth weight and thus might increase the future risk of  
 238 developing obesity and related metabolic diseases. Hence, it is equally important to target  
 239 paternal pre-pregnancy body weight as maternal body weight during preconception health  
 240 advice.

241 Mothers have long been the focus of preconception care. Women of reproductive age are  
 242 recommended to take folic acid, calcium, vitamin supplements, to taper off alcohol and  
 243 smoking, reduce coffee consumption, and maintain healthy body weight (Abbasi, 2017).  
 244 Although mothers take more responsibilities than fathers in conceiving a healthy baby,  
 245 the influence of paternal pre-conception BMI on birth weight cannot be neglected  
 246 (Campbell and McPherson, 2019). Paternal preconception environmental exposures also  
 247 closely related to offspring's birth weight (Shea and Little, 1997, Moss and Harris, 2015),  
 248 and future health (Kaati *et al.*, 2002, Yen *et al.*, 2016) of their offspring. Detailed  
 249 mechanism of transgenerational effects has not been elucidated yet, but was thought to be  
 250 associated with spermatozoan coding RNAs (Krawetz, 2005), DNA methylation  
 251 imprinted in sperm (Soubry *et al.*, 2016), and identified features specific to sex  
 252 chromosomes that related to epigenetic information (Pembrey *et al.*, 2006, Navratilova *et*  
 253 *al.*, 2017). Consistently, we observed that preconception paternal body weight was

associated with offspring's birth weight. The potential role of paternal exposure on offspring health status was supported by Shea and Little's finding which had a group of fathers exposed to x-ray examinations within one year prior to conception. They found that the x-ray exposure had a marginally significant influence on birth weight, compared with those without it (3,358 g *vs.* 3,437 g;  $p = 0.055$ ). (Shea and Little, 1997). Likewise, in a longitudinal study ( $n=372$ ) based on the National Longitudinal Study of Adolescent Health, preconception paternal BMI was associated with offspring's birth weight (relative to father with normal weight, mean difference in birth weight was 35.6 g for overweight father, and 76.8 g for obese father) (Moss and Harris, 2015). The non-significant results of this study could be explained, at least in part, by its modest sample size (372 father-mother-infant trios) and crude estimation of biological relationship between father and children. Two previous cohort studies have been performed in 2,947 Netherland and 1,041 Australian children, respectively (L'Abée *et al.*, 2011, Pomeroy *et al.*, 2015). In accordance with the present study, no significant difference between paternal BMI and birthweight was evident. However, pre-term babies (<37 gestational weeks) were included in the analysis (L'Abée *et al.*, 2011). Another possible explanation for the discrepancy between our results and previous studies might be due to the inclusion of multipara mothers in the analysis (L'Abée *et al.*, 2011, Moss and Harris, 2015, Pomeroy *et al.*, 2015).

In subgroup analysis, male neonates, neonates with overweight mothers, or with mothers who experienced excessive GWG were more likely to get greater birth weight, compared to their counterparts. Paternal epigenetic information seems to transfer to male offspring in sex-specific rule. In the current study, paternal BMI only correlated with

their son's, but not with their daughter's birth weight. Our results were consistent with Chen's study (Chen *et al.*, 2012). In addition, Similar sex-specific transgenerational responses were also observed in Swedish population (Pembrey *et al.*, 2006). Paternal smoking was associated with greater BMI at year 9 in sons, but not in daughters. Further, paternal grandfather's food supply was only linked to the mortality of grandsons (Pembrey *et al.*, 2006). A possible explanation for this is that paternal epigenetic information might leave marks on Y chromosome, hence is transferred only to male offspring (Pembrey *et al.*, 2006, Navratilova *et al.*, 2017). It is well recognized that maternal preconception obesity and higher gestational weight gain were associated with larger birth size (Strutz *et al.*, 2012, Secher *et al.*, 2014, Catalano and Shankar, 2017). Paternal effects on birth weight of their offspring were more pronounced only in neonates with overweight mother, or with mother who gained excessive weight in pregnancy. These results suggest that paternal effects could be modified by maternal factors during pregnancy.

Strengths of the current study included its longitudinal design, a large sample size, and precise assessment of the biological relationship between father and their children. Our study had several limitations. Firstly, both paternal and maternal body weight before pregnancy was self-reported, which might result in misclassification. However, self-reported weight is generally accurate and had high correlation with measured weight (Stunkard and Albaum, 1981, Leary *et al.*, 2010). Secondly, residual confounding is of concern because paternal demographic information, such as age (Sharma *et al.*, 2015), smoking (Han *et al.*, 2015, Yen *et al.*, 2016), and occupation (Friberg *et al.*, 2015) were not collected and these missing data could be associated with offspring's future health

(Cheng *et al.*, 2016). Finally, the macrosomia is considered as a more reliable parameter to predict the risk of future obesity and cardiovascular diseases compared to birth weight (Szostak-Wegierek, 2014, Woo Baidal *et al.*, 2016). However, being limited to a lack of macrosomia cases (114/1810), the statistical power of the current study was low to explore the relationship between paternal body weight and risk of macrosomia, though positive association between the preconception paternal body weight and birth weight was confirmed.

In conclusion, paternal preconception body weight was associated with birth weight of their offspring. Future studies with detailed information on preconception paternal demographics are warranted to confirm our findings.

**Funding details:** The study was supported by Scientific Research Starting Foundation of South Campus Ren Ji Hospital (2014QDQ10), and by the grant from Shanghai Key Laboratory of Pediatric Gastroenterology and Nutrition (No.17DZ2272000).

**Disclosure statement:** all the authors declared no conflict interest.

**Data Sharing statement:** The SAS code and data that support the findings of this study are available from the first author upon reasonable request (*Renying Xu*, email address: [xurenying7465@126.com](mailto:xurenying7465@126.com)).

321

## 322 **References**

- 323 Abbasi, J., 2017. The Paternal Epigenome Makes Its Mark. *JAMA*.
- 324 Anon, 2009. In K.M. Rasmussen & A.L. Yaktine (eds.) *Weight Gain During Pregnancy: Reexamining the Guidelines*. Washington (DC).
- 325 Black, R.E., Victora, C.G., Walker, S.P., Bhutta, Z.A., Christian, P., De Onis, M., Ezzati, M.,
- 326 Grantham-Mcgregor, S., Katz, J., Martorell, R., Uauy, R., Maternal & Child Nutrition
- 327 Study, G., 2013. Maternal and child undernutrition and overweight in low-income and
- 328 middle-income countries. *Lancet*, 382, 427-451.
- 329 Campbell, J.M. & Mcpherson, N.O., 2019. Influence of increased paternal BMI on pregnancy and
- 330 child health outcomes independent of maternal effects: A systematic review and meta-
- 331 analysis. *Obes Res Clin Pract*, 13, 511-521.
- 332 Catalano, P.M. & Shankar, K., 2017. Obesity and pregnancy: mechanisms of short term and long
- 333 term adverse consequences for mother and child. *BMJ*, 356, j1.
- 334 Chen, Y.P., Xiao, X.M., Li, J., Reichetzed, C., Wang, Z.N. & Hoher, B., 2012. Paternal body mass
- 335 index (BMI) is associated with offspring intrauterine growth in a gender dependent
- 336 manner. *PLoS One*, 7, e36329.
- 337 Cheng, E.R., Hawkins, S.S., Rifas-Shiman, S.L., Gillman, M.W. & Taveras, E.M., 2016. Association
- 338 of missing paternal demographics on infant birth certificates with perinatal risk factors
- 339 for childhood obesity. *BMC Public Health*, 16, 453.
- 340 Cooper, R., Hypponen, E., Berry, D. & Power, C., 2010. Associations between parental and
- 341 offspring adiposity up to midlife: the contribution of adult lifestyle factors in the 1958
- 342 British Birth Cohort Study. *Am J Clin Nutr*, 92, 946-53.
- 343 Friberg, D., Lundkvist, K., Li, X. & Sundquist, K., 2015. Parental poverty and occupation as risk
- 344 factors for pediatric sleep-disordered breathing. *Sleep Med*, 16, 1169-75.
- 345 Haire-Joshu, D. & Tabak, R., 2016. Preventing Obesity Across Generations: Evidence for Early Life
- 346 Intervention. *Annu Rev Public Health*, 37, 253-71.
- 347 Han, T.S., Hart, C.L., Haig, C., Logue, J., Upton, M.N., Watt, G.C. & Lean, M.E., 2015.
- 348 Contributions of maternal and paternal adiposity and smoking to adult offspring
- 349 adiposity and cardiovascular risk: the Midspan Family Study. *BMJ Open*, 5, e007682.
- 350 Kaati, G., Bygren, L.O. & Edvinsson, S., 2002. Cardiovascular and diabetes mortality determined
- 351 by nutrition during parents' and grandparents' slow growth period. *Eur J Hum Genet*, 10,
- 352 682-8.
- 353 Kominiarek, M.A. & Peaceman, A.M., 2017. Gestational weight gain. *Am J Obstet Gynecol*.
- 354 Krawetz, S.A., 2005. Paternal contribution: new insights and future challenges. *Nat Rev Genet*, 6,
- 355 633-42.
- 356 L'abee, C., Vrieze, I., Kluck, T., Erwich, J.J., Stolk, R.P. & Sauer, P.J., 2011. Parental factors
- 357 affecting the weights of the placenta and the offspring. *J Perinat Med*, 39, 27-34.
- 358 Leary, S., Davey Smith, G. & Ness, A., 2010. No evidence of large differences in mother-daughter
- 359 and father-son body mass index concordance in a large UK birth cohort. *Int J Obes*
- 360 *(Lond)*, 34, 1191-2.
- 361 Lowensohn, R.I., Stadler, D.D. & Naze, C., 2016. Current Concepts of Maternal Nutrition. *Obstet*
- 362 *Gynecol Surv*, 71, 413-26.



364 Moss, J.L. & Harris, K.M., 2015. Impact of maternal and paternal preconception health on birth  
365 outcomes using prospective couples' data in Add Health. *Arch Gynecol Obstet*, 291, 287-  
366 98.

367 Navratilova, P., Danks, G.B., Long, A., Butcher, S., Manak, J.R. & Thompson, E.M., 2017. Sex-  
368 specific chromatin landscapes in an ultra-compact chordate genome. *Epigenetics*  
369 *Chromatin*, 10, 3.

370 Ng, S.F., Lin, R.C., Laybutt, D.R., Barres, R., Owens, J.A. & Morris, M.J., 2010. Chronic high-fat diet  
371 in fathers programs beta-cell dysfunction in female rat offspring. *Nature*, 467, 963-6.

372 Pembrey, M.E., Bygren, L.O., Kaati, G., Edvinsson, S., Northstone, K., Sjöström, M., Golding, J. &  
373 Team, A.S., 2006. Sex-specific, male-line transgenerational responses in humans. *Eur J*  
374 *Hum Genet*, 14, 159-66.

375 Pomeroy, E., Wells, J.C., Cole, T.J., O'callaghan, M. & Stock, J.T., 2015. Relationships of maternal  
376 and paternal anthropometry with neonatal body size, proportions and adiposity in an  
377 Australian cohort. *Am J Phys Anthropol*, 156, 625-36.

378 Rossi, A.C., Mullin, P. & Prefumo, F., 2013. Prevention, management, and outcomes of  
379 macrosomia: a systematic review of literature and meta-analysis. *Obstet Gynecol Surv*,  
380 68, 702-9.

381 Sebire, N.J., Jolly, M., Harris, J.P., Wadsworth, J., Joffe, M., Beard, R.W., Regan, L. & Robinson, S.,  
382 2001. Maternal obesity and pregnancy outcome: a study of 287,213 pregnancies in  
383 London. *Int J Obes Relat Metab Disord*, 25, 1175-82.

384 Secher, A.L., Parellada, C.B., Ringholm, L., Asbjørnsdottir, B., Damm, P. & Mathiesen, E.R., 2014.  
385 Higher gestational weight gain is associated with increasing offspring birth weight  
386 independent of maternal glycemic control in women with type 1 diabetes. *Diabetes Care*,  
387 37, 2677-84.

388 Sharma, R., Agarwal, A., Rohra, V.K., Assidi, M., Abu-Elmagd, M. & Turki, R.F., 2015. Effects of  
389 increased paternal age on sperm quality, reproductive outcome and associated  
390 epigenetic risks to offspring. *Reprod Biol Endocrinol*, 13, 35.

391 Shea, K.M. & Little, R.E., 1997. Is there an association between preconception paternal x-ray  
392 exposure and birth outcome? The ALSPAC Study Team. Avon Longitudinal Study of  
393 Pregnancy and Childhood. *Am J Epidemiol*, 145, 546-51.

394 Soubry, A., Guo, L., Huang, Z., Hoyo, C., Romanus, S., Price, T. & Murphy, S.K., 2016. Obesity-  
395 related DNA methylation at imprinted genes in human sperm: Results from the TIEGER  
396 study. *Clin Epigenetics*, 8, 51.

397 Srikanth, S. & Deedwania, P., 2016. Management of Dyslipidemia in Patients with Hypertension,  
398 Diabetes, and Metabolic Syndrome. *Curr Hypertens Rep*, 18, 76.

399 Strutz, K.L., Richardson, L.J. & Hussey, J.M., 2012. Preconception health trajectories and birth  
400 weight in a national prospective cohort. *J Adolesc Health*, 51, 629-36.

401 Stunkard, A.J. & Albaum, J.M., 1981. The accuracy of self-reported weights. *Am J Clin Nutr*, 34,  
402 1593-9.

403 Szostak-Wegierek, D., 2014. Intrauterine nutrition: long-term consequences for vascular health.  
404 *Int J Womens Health*, 6, 647-56.

405 Wahlqvist, M.L., Krawetz, S.A., Rizzo, N.S., Dominguez-Bello, M.G., Szymanski, L.M., Barkin, S.,  
406 Yatkine, A., Waterland, R.A., Mennella, J.A., Desai, M., Ross, M.G., Krebs, N.F., Young,  
407 B.E., Wardle, J., Wrann, C.D. & Kral, J.G., 2015. Early-life influences on obesity: from  
408 preconception to adolescence. *Ann N Y Acad Sci*, 1347, 1-28.

409 Woo Baidal, J.A., Locks, L.M., Cheng, E.R., Blake-Lamb, T.L., Perkins, M.E. & Taveras, E.M., 2016.  
410 Risk Factors for Childhood Obesity in the First 1,000 Days: A Systematic Review. *Am J*  
411 *Prev Med*, 50, 761-779.

Yen, A.M., Boucher, B.J., Chiu, S.Y., Fann, J.C., Chen, S.L., Huang, K.C. & Chen, H.H., 2016. Longer Duration and Earlier Age of Onset of Paternal Betel Chewing and Smoking Increase Metabolic Syndrome Risk in Human Offspring, Independently, in a Community-Based Screening Program in Taiwan. *Circulation*, 134, 392-404.

Zhou, B. & Cooperative Meta-Analysis Group of Working Group on Obesity In, C., 2002. [Prospective study for cut-off points of body mass index in Chinese adults]. *Zhonghua Liu Xing Bing Xue Za Zhi*, 23, 431-4.

## Figure Legend

**Figure 1.** Mean difference and 95% confidence intervals in offspring's birth weight associated with per SD increase of paternal preconception BMI in 1,810 Chinese mother-father-baby trios.

### Note:

**1.** Interaction between paternal body weight status and offspring's sex p value=0.04; interaction between maternal and paternal body weight status p value<0.001; interaction between paternal body weight status and gestational weight gain p value<0.001.

**2.** Adjusted for offspring's sex, delivery gestational week (week), maternal age, GWG (kg), BMI ( $\text{kg/m}^2$ ), education (less than or equal to high school, *or* college or above), parity (primipara *or* non-primipara), family history of diseases ('yes' *or* 'no'), hemoglobin (g/L), systolic blood pressure (mmHg), diastolic blood pressure (mmHg), plasma level of triglyceride (mmol/L), total cholesterol (mmol/L), low density lipoprotein cholesterol (mmol/L), high density lipoprotein cholesterol (mmol/L), and fasting plasma glucose (mmol/L) at the first prenatal check-up (~15<sup>th</sup>-16<sup>th</sup> gestational week).

440

441 **Table 1.** The maternal and neonatal baseline characteristics by paternal body weight

442 status

| Subjects             | Variables                        | Father's body weight status |                |          | P<br>value |      |
|----------------------|----------------------------------|-----------------------------|----------------|----------|------------|------|
|                      |                                  | Normal                      | overweigh<br>t | obese    |            |      |
| Maternal             | Number                           | 958                         | 651            | 201      | --         |      |
|                      | Age, y                           | 28.6±4.0                    | 29.3±4.0       | 28.8±3.8 | <0.01      |      |
|                      | BMI, kg/m <sup>2</sup>           | 20.9±3.1                    | 21.2±3.0       | 21.6±3.0 | <0.01      |      |
|                      | Family history of<br>diseases, % |                             |                |          |            |      |
|                      |                                  | Yes                         | 22.7           | 26.2     | 33.3       | 0.01 |
|                      |                                  | No                          | 77.3           | 73.9     | 66.7       |      |
|                      | Hemoglobin, g/L <sup>+</sup>     | 118±10.5                    | 121±43.1       | 119±9.7  | 0.27       |      |
|                      | SBP, mmHg <sup>+</sup>           | 111±12.6                    | 111±13.6       | 112±14.0 | 0.55       |      |
|                      | DBP, mmHg <sup>+</sup>           | 66.4±9.6                    | 66.5±9.7       | 67.3±9.3 | 0.44       |      |
|                      | TG, mmol/L <sup>+</sup>          | 1.8±0.8                     | 1.9±0.9        | 1.8±0.8  | 0.24       |      |
|                      | TC, mmol/L <sup>+</sup>          | 5.6±1.0                     | 5.6±1.1        | 5.5±1.1  | 0.69       |      |
|                      | HDL-C, mmol/L <sup>+</sup>       | 2.1±0.4                     | 2.1±0.4        | 2.1±0.4  | 0.28       |      |
|                      | LDL-C, mmol/L <sup>+</sup>       | 2.9±0.8                     | 2.9±0.8        | 2.9±0.8  | 0.95       |      |
|                      | FPG, mmol/L <sup>+</sup>         | 4.5±0.5                     | 4.6±0.4        | 4.6±0.3  | 0.43       |      |
|                      | GWG, %                           |                             |                |          |            |      |
|                      |                                  | Inadequate                  | 20.7           | 19.4     | 23.9       | 0.18 |
|                      |                                  | Optimal                     | 38.6           | 37.9     | 28.9       |      |
|                      |                                  | Excessive                   | 40.7           | 42.7     | 47.3       |      |
|                      | Delivery gestational week        | 39.0±1.1                    | 39.0±1.0       | 39.0±1.1 | 0.70       |      |
|                      | Parity, %                        |                             |                |          |            |      |
|                      |                                  | Primipara                   | 79.3           | 77.4     | 82.1       | 0.47 |
|                      |                                  | Non-primipara               | 20.7           | 22.6     | 17.9       |      |
| Highest education, % |                                  |                             |                |          |            |      |

|          |                  |               |           |           |           |       |
|----------|------------------|---------------|-----------|-----------|-----------|-------|
|          |                  | ≤ high school | 50        | 44.1      | 59.7      | <0.01 |
|          |                  | ≥ college     | 50        | 55.9      | 40.3      |       |
| Neonatal | Sex, girls, %    |               | 49.5      | 45.8      | 45.8      | 0.36  |
|          | Birth weight, g  |               | 3,338±384 | 3,388±384 | 3,437±416 | <0.01 |
|          | Birth length, cm |               | 50.1±1.0  | 50.1±1.4  | 50.2±1.1  | 0.13  |

**Note:**

1. BMI, body mass index; SBP, systolic blood pressure; DBP, diastolic blood pressure; TG, triglyceride; TC, total cholesterol, FPG, fasting plasma glucose; GWG, gestational weight gain.

2. \*, abnormal distribution; +, obtained at the first prenatal check-up (gestational age ~15<sup>th</sup> -16<sup>th</sup> week); '--' mean not applicable.

3. Paternal body weight status was defined as follows: 'normal' (BMI < 24.0 kg/m<sup>2</sup>), 'overweight' (24.0 kg/m<sup>2</sup> ≤ BMI < 28.0 kg/m<sup>2</sup>), and 'obese' (BMI ≥ 28.0 kg/m<sup>2</sup>) according to the Working Group of Obesity in China (WGOC) criteria for adults.

463

464 **Table 2.** Mean difference and 95% confidence intervals in offspring's birth weight across  
465 three paternal groups in 1, 810 Chinese father-mother-baby trios

| Model   | Father's body weight status |                    |                   | Per SD            | P trend |
|---------|-----------------------------|--------------------|-------------------|-------------------|---------|
|         | Normal                      | Overweight         | Obese             |                   |         |
| Number  | 958                         | 651                | 201               | /                 | /       |
| Model 1 | <b>0 (Ref)</b>              | 52.5 (16.5, 88.4)  | 97.0 (42.1, 152)  | 38.2 (21.6, 54.9) | <0.001  |
| Model 2 | <b>0 (Ref)</b>              | 48.9 (13.8, 84.0)  | 94.4 (40.7, 148)  | 36.0 (19.6, 52.4) | <0.001  |
| Model 3 | <b>0 (Ref)</b>              | 49.6 (-3.3, 102.5) | 87.3 (8.9, 165.6) | 35.5 (11.5, 59.4) | 0.004   |

466 **Note:**

467 **1.** Father's body weight status was defined as follows: 'normal' ( $\text{BMI} < 24.0 \text{ kg/m}^2$ ),  
468 'overweight' ( $24.0 \text{ kg/m}^2 \leq \text{BMI} < 28.0 \text{ kg/m}^2$ ), and 'obese' ( $\text{BMI} \geq 28.0 \text{ kg/m}^2$ )  
469 according to the Working Group of Obesity in China (WGO) criteria for adults. '/'  
470 mean not applicable. Per SD for paternal BMI  $\approx 3.27 \text{ kg/m}^2$ .

471 **2.** Dyslipidemia was diagnosed if any of the following was addressed: triglyceride  $\geq 1.7$   
472 mmol/L, total cholesterol  $\geq 5.72 \text{ mmol/L}$ , low-density lipoprotein cholesterol  $\geq 3.4 \text{ mmol/L}$ ,  
473 high-density lipoprotein cholesterol  $< 1.0 \text{ mmol/L}$ .

474 **3. Model 1** adjusted for offspring's sex and delivery gestational week (week).

475 **4. Model 2** adjusted for variables in **model 1** and further adjusted for maternal age,  
476 GWG (kg), BMI ( $\text{kg/m}^2$ ), education (less than or equal to high school **or** college or  
477 above), family history of metabolic diseases ('yes' **or** 'no') and parity (primipara **or** non-  
478 primipara).

479 **5. Model 3** adjusted for variables in **model 2** and further adjusted for hemoglobin (g/L),  
480 systolic blood pressure (mmHg), diastolic blood pressure (mmHg), dyslipidemia ('yes',  
481 **or** 'no'), and fasting plasma glucose (mmol/L) at the first prenatal check-up ( $\sim 15^{\text{th}}$ - $16^{\text{th}}$   
482 gestational week).

483

484

485 **Table 3.** Adjusted Odd Ratios and 95% confidence intervals for risks of macrosomia  
486 across three paternal groups in 1, 810 Chinese father-mother-baby trios

| Model   | Father's body weight status |                   |                   | Per SD             | P trend |
|---------|-----------------------------|-------------------|-------------------|--------------------|---------|
|         | Normal                      | Overweight        | Obese             |                    |         |
| Number  | 958                         | 651               | 201               | /                  | /       |
| No.     | 49                          | 39                | 16                | /                  | /       |
| Model 1 | <b>0 (Ref)</b>              | 1.21 (0.78, 1.88) | 1.59 (0.88, 2.89) | 1.21 (1.001, 1.46) | 0.049   |
| Model 2 | <b>0 (Ref)</b>              | 1.18 (0.76, 1.84) | 1.47 (0.8, 2.69)  | 1.17 (0.97, 1.41)  | 0.11    |
| Model 3 | <b>0 (Ref)</b>              | 1.09 (0.57, 2.11) | 1.23 (0.5, 3.03)  | 1.11 (0.84, 1.46)  | 0.47    |

487 **Note:**

488 **1.** Paternal body weight status was defined as follows: 'normal' ( $\text{BMI} < 24.0 \text{ kg/m}^2$ ),  
489 'overweight' ( $24.0 \text{ kg/m}^2 \leq \text{BMI} < 28.0 \text{ kg/m}^2$ ), and 'obese' ( $\text{BMI} \geq 28.0 \text{ kg/m}^2$ )  
490 according to the Working Group of Obesity in China (WGOC) criteria for adults.  
491 Macrosomia was defined as birth weight was equal or greater than 4000 g.

492 **2.** '/' mean not applicable. Per SD for paternal  $\text{BMI} \approx 3.27 \text{ kg/m}^2$ .

493 **3.** Dyslipidemia was diagnosed if any of the following was addressed: triglyceride  $\geq 1.7$   
494 mmol/L, total cholesterol  $\geq 5.72 \text{ mmol/L}$ , low-density lipoprotein cholesterol  $\geq 3.4 \text{ mmol/L}$ ,  
495 high-density lipoprotein cholesterol  $< 1.0 \text{ mmol/L}$ .

496 **4. Model 1** adjusted for offspring's sex and delivery gestational week (week).

497 **5. Model 2** adjusted for variables in **model 1** and further adjusted for maternal age, GWG  
498 (kg), BMI ( $\text{kg/m}^2$ ), education (less than or equal to high school **or** college or above),  
499 family history of metabolic diseases ('yes' **or** 'no') and parity (primipara **or** non-  
500 primipara).

501 **6. Model 3** adjusted for variables in **model 2** and further adjusted for hemoglobin (g/L),  
502 systolic blood pressure (mmHg), diastolic blood pressure (mmHg), dyslipidemia ('yes',  
503 **or** 'no'), and fasting plasma glucose (mmol/L) at the first prenatal check-up ( $\sim 15^{\text{th}}$ - $16^{\text{th}}$   
504 gestational week).

505

506

## 507 **Supporting Information legends**

508 **Supplemental Table 1.** The association between parental preconception BMI and their  
509 children's birth weight in 1,810 Chinese mother-father-baby trios

510 **Supplemental Table 2.** Mean difference and 95% confidence intervals in offspring's  
511 birth weight (g/week) adjusted by delivery gestational week, across three paternal groups  
512 in 1,810 Chinese mother-father-baby trios

513 **Supplemental Table 3.** Mean difference and 95% confidence intervals in offspring's  
514 birth weight adjusted by birth length (g/cm), across three paternal groups in 1,810  
515 Chinese mother-father-baby trios

516 **Supplemental Table 4.** Mean difference and 95% confidence intervals in offspring's  
517 birth weight (g), across three paternal groups in 1,648 Chinese mother-father-baby trios,  
518 excluding women aged 35 years old or more

519 **Supplemental Table 5.** Mean difference and 95% confidence intervals in offspring's  
520 birth weight (g), across three paternal groups in 1,753 Chinese mother-father-baby trios,  
521 excluding father with underweight

522

523 **Supplemental Figure 1.** Sample recruitment in the study.

524

525

526

527

528



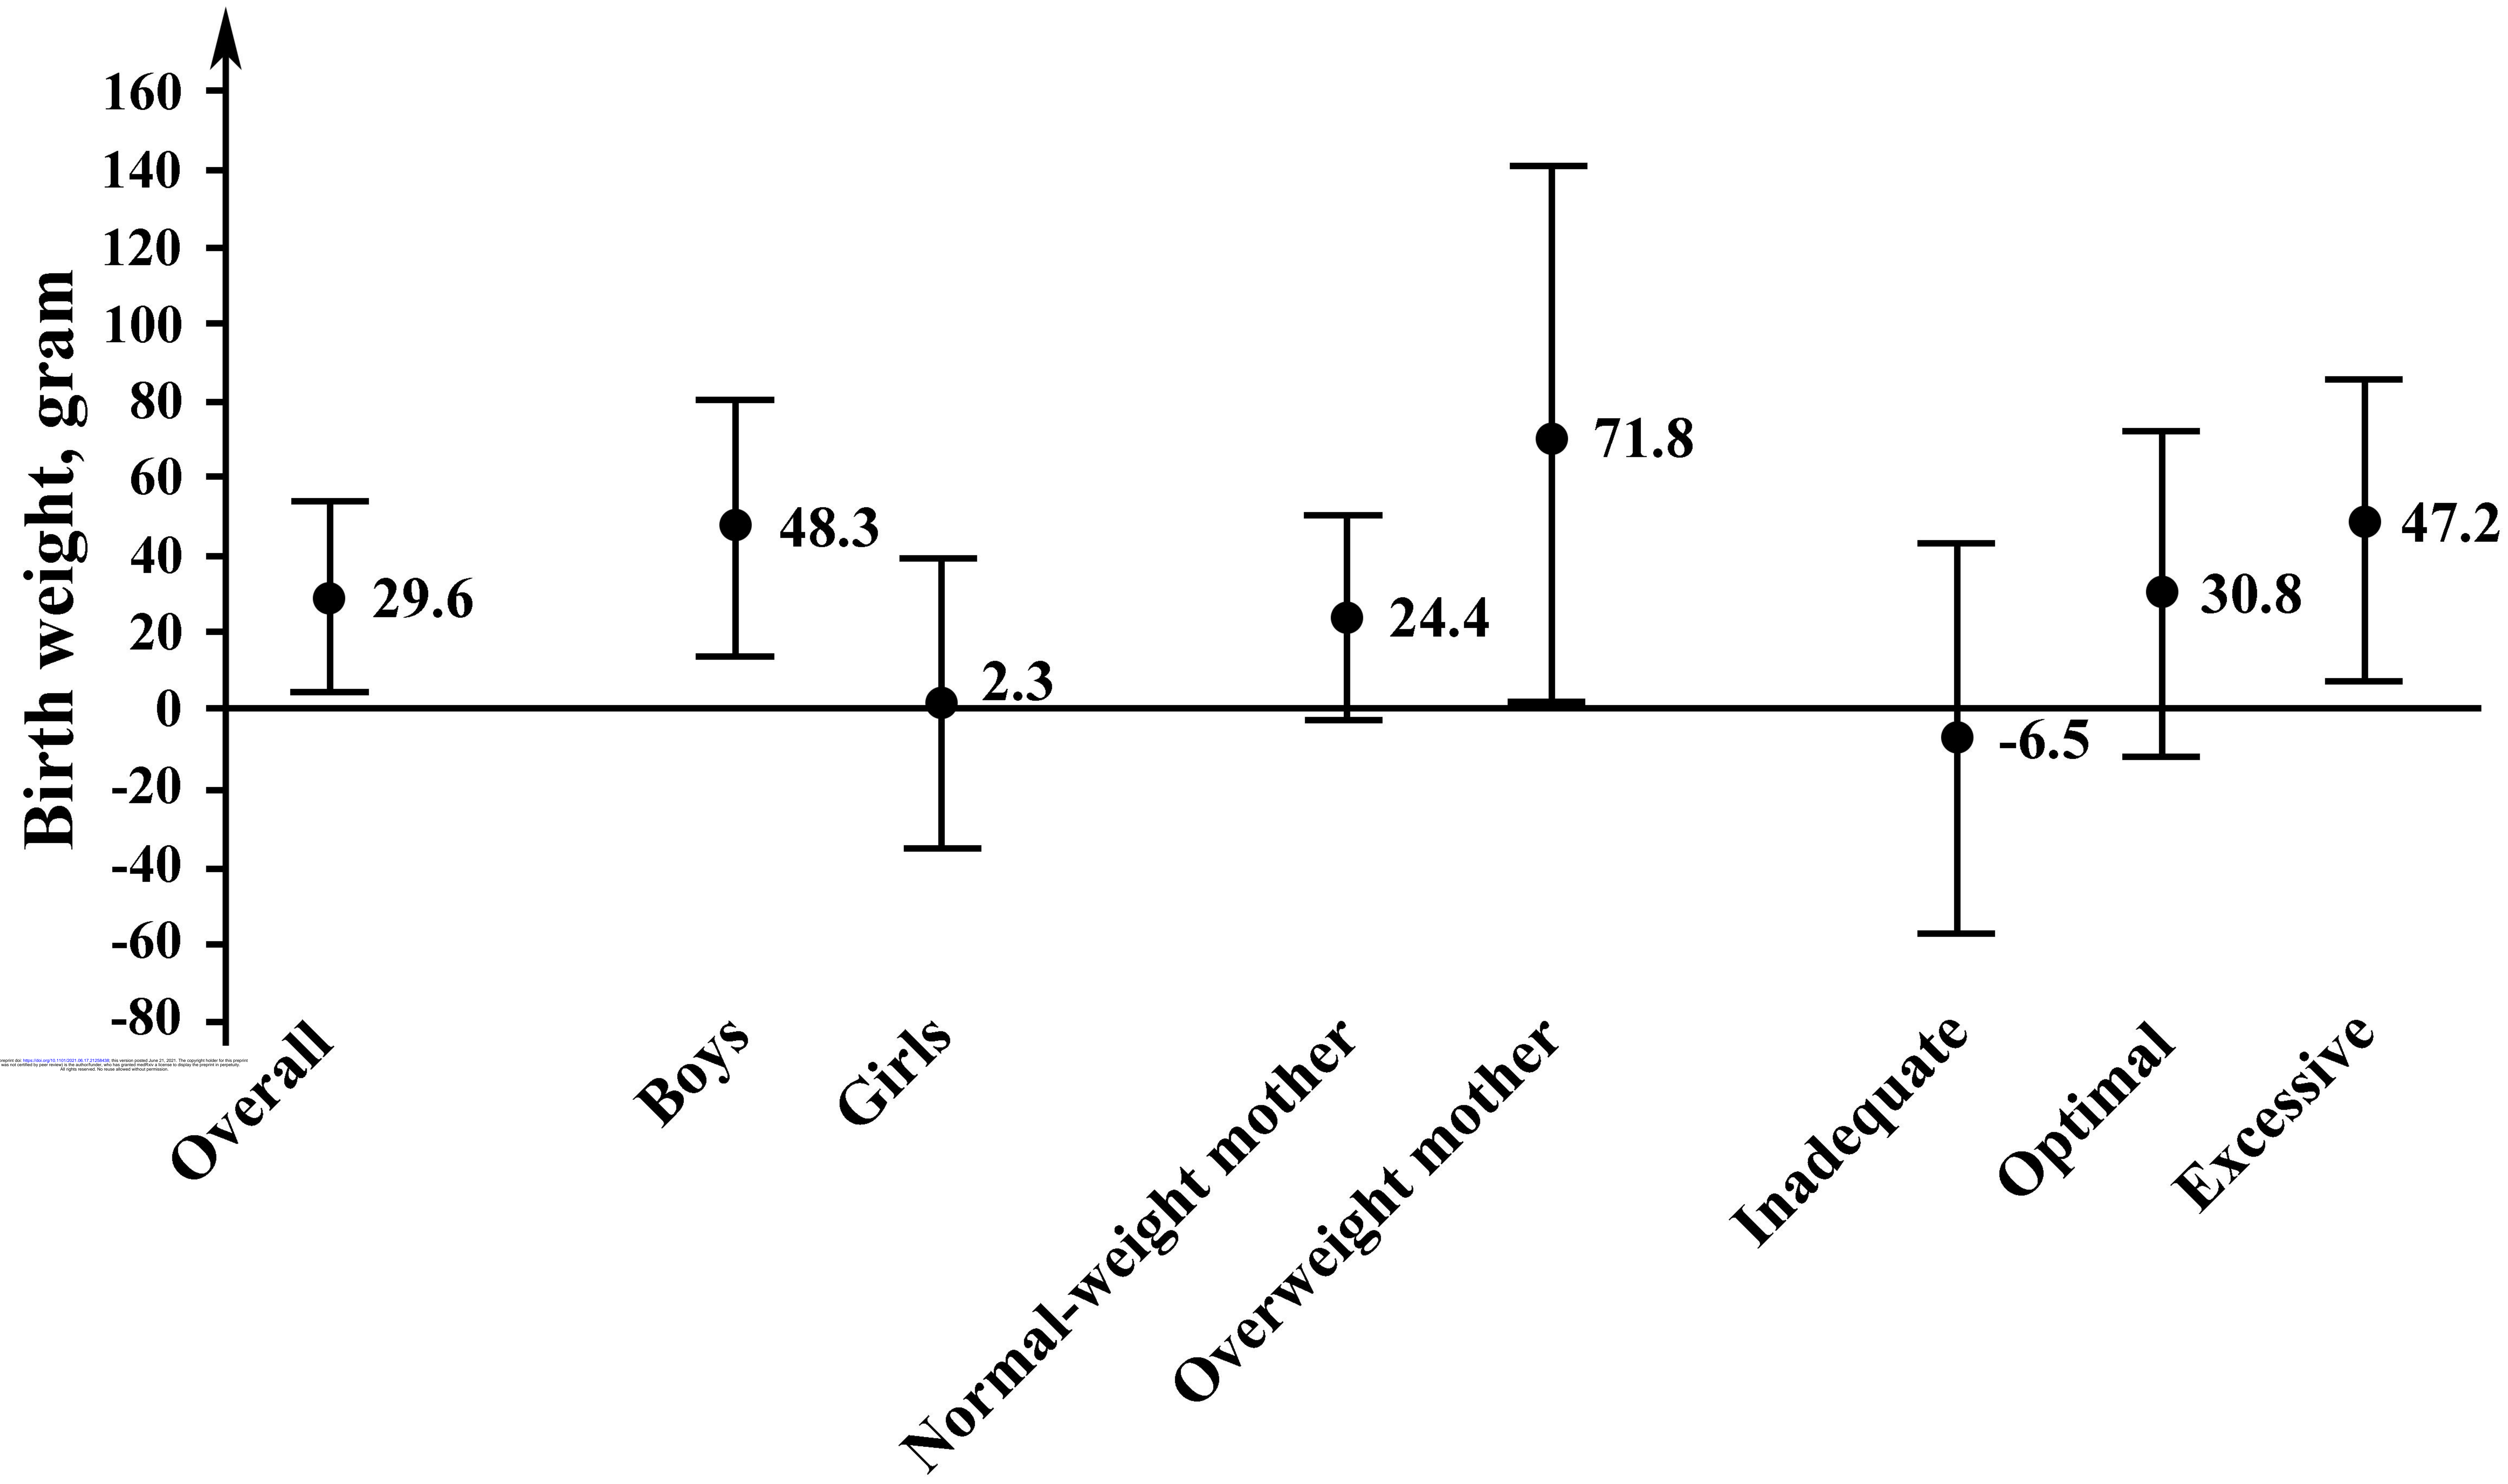

Source: https://www.medrxiv.org/content/medrxiv/early/2021/06/21/2021.06.17.21258438.full.pdf
